# 1 **Adapting insect ‘caste’ concepts to the demands of bio-ontologies.**

2 Thiago S. R. Silva\* & Marcio R. Pie

3 Departamento de Zoologia, Universidade Federal do Paraná

4 \*Corresponding Author’s Email: [tstranzanidasilva@gmail.com](mailto:tstranzanidasilva@gmail.com)

5

## 6 **Abstract**

7 The present work provides a logical account for translating ‘caste’ concepts in social  
8 insects to an ontology-based data model, which can be used by researchers for  
9 describing and organizing entities belonging to non-human societies, as well as for the  
10 provision of evidential criteria for evaluating constitutive explanations of ‘social’  
11 entities. We establish the top-level category for the concept of ‘caste’ and give  
12 examples on how to accommodate some subcategories (*e.g.* workers) in the ontology,  
13 following a domain granularity framework for the life sciences. We also provide  
14 accounts on current limitations in automated reasoning, current practices for ‘caste’  
15 conceptualization, and improvements needed to be addressed in future works

16

## 17 **Introduction**

18 Terminological standardization has been a matter of debate among research  
19 groups that study insect societies for several years (Costa & Fitzgerald 1996, 2005;  
20 Peeters 2012; Neco *et al.* 2018; Silva & Feitosa 2019a; Sumner *et al.* 2018).  
21 According to several authors (*e.g.* Costa & Fitzgerald 2005; Crespi & Yanega 1995;  
22 Dew *et al.* 2016; Sumner *et al.* 2018), there are distinct reasons for the need for  
23 terminological univocity in this field of inquiry: (i) to provide a clearer conceptual  
24 landscape that enables researchers to explore drivers in the evolution of sociality in  
25 animals, (ii) to provide the linguistic components for a more straightforward  
26 communication, whether textually or orally, and (iii) to provide a framework for  
27 unified concept representation and organization, enhancing data comparability and  
28 reproducibility. Aiming for concept clarity is an important first step for  
29 standardization of specialized terminologies, although it does not directly entail  
30 standardization *per se*, since other terminological dimensions must be explored for  
31 consolidation of shared sets of terms (Epstein 2012; Faber 2015; Faber & León-Araúz  
32 2016). While the above mentioned authors (and many others) provided distinct  
33 accounts on defining criteria for establishing unambiguous concepts of social  
34 categories in insect societies, few of them have tried to explore how these categories

35 can be translated into data models. While urging for ‘holistic’ approaches for defining  
36 and describing social categories, researchers generally opt for combined frames of  
37 reference when defining ‘castes’, namely spatio-structural and functional frames  
38 (Michener 1974; Wilson 1975; Dew *et al.* 2016; Silva & Feitosa 2019a).

39 Although cross-referencing during concept representation can be considered the  
40 best approach for establishing conceptual boundaries of biological entities, authors  
41 normally equivocally ascribe concepts to certain frames in this process, leading to  
42 category mistakes (Ryle 2009). A category mistake is a semantic or ontological error  
43 made by an enunciator when it represents the facts of mental life as if they belonged  
44 to one logical entity or category (or domains of entities) when they actually belong to  
45 another (Ryle 2009; for examples of category mistakes in ‘caste’ representation see  
46 Figures 4 and 5 of Silva & Feitosa 2019a). According to Tanney (2009), researchers  
47 are partly led to construe mental concepts as signifying occurrences of underlying  
48 processes because they conflate how they explain an individual’s successful moves  
49 with what they require of the individual in making those moves. In short, researchers  
50 make category mistakes because they normally conflate explanation with description.  
51 Despite being a simplified explanation on the causes of this semantic/ontological  
52 phenomena – since the origins of category mistakes are not so easily accounted for  
53 (Magidor 2019) – and considering that the process of description inevitably entails  
54 some sort of explanation, it is important to consider the implications of category  
55 mistakes in life sciences, especially if we intend to explore compositional approaches  
56 when representing biological concepts. Applying a logical framework that  
57 incorporates distinct frames of reference and levels of organization will help  
58 researchers account for the infelicity of category mistakes, at least to some degree.

59 Similar to other biological systems, insect societies have been investigated and  
60 understood within a general idea of levels of organization (Molet *et al.* 2012;  
61 Strassman & Queller 2007; Sumner *et al.* 2018). The concept of levels can be broadly  
62 defined as the structure in which the natural world is perceived and organized,  
63 comprising several vertically stratified layers of entities and processes, such as the  
64 molecular, cellular, tissue, organ, organism, population, and ecosystem levels (Brooks  
65 *et al.* 2021). The general idea of levels of organization is extremely useful in several  
66 distinct contexts, ranging from descriptions to explanations and the provision of  
67 ontological inventories (List 2019), providing an important conceptual framework in  
68 various scientific and philosophical debates (Simon 1962; Schaffer 2003; Craver &

69 Bechtel 2007; Eronen 2013). In biology, various accounts of hierarchical  
70 compositionality of different levels of biological organization were proposed, in an  
71 attempt to answer how biological entities interacted with each other to form other  
72 entities belonging to more inclusive levels (Novikoff 1945; Wimsatt 1994; Heylighen  
73 2000; Korn 2005).

74 With the growing need of researchers to manage large amounts of data with the  
75 help of computers and software applications, propositions of levels and hierarchies  
76 based on levels found their way to information science and ontology research (Vogt  
77 2019). Accordingly, ontology researchers have developed their approaches to levels  
78 (*i.e.* granularity levels) and to different types of hierarchies based on levels (*i.e.*  
79 granular perspectives), while providing explicit criteria for identifying and  
80 demarcating different levels and different hierarchies (*i.e.* granularity framework)  
81 (Vogt 2019). An ontology consists of a set of terms with commonly accepted  
82 definitions that are formulated in a highly formalized canonical syntax and  
83 standardized format, yielding a lexical or taxonomical framework for knowledge  
84 representation (Smith 2003). They are interesting tools for representing and  
85 organizing specialized knowledge, especially when we are trying to arrange entities  
86 into a set of different levels of organization.

87 The terms in an ontology are organized into a nested hierarchy of classes and  
88 subclasses, forming a tree of increasingly specialized terms that is called a taxonomy  
89 (Rosse *et al.* 1998). However, when ontology researchers need to refer to hierarchies  
90 other than taxonomies, for example, a parthood (i.e., a hierarchy based on  
91 part-whole relations), they usually do that in reference to some (external) granularity  
92 framework (Vogt 2019). Such parthoods, however, are usually only expressed  
93 indirectly through formalized descriptions specifying parthood relations between  
94 resources within the taxonomy of an ontology. This often results in the respective  
95 ontology containing several disconnected parthoods that provide only locally  
96 applicable parthood-based granularity schemes, as opposed to a single globally and  
97 universally applicable scheme (Vogt 2019).

98 The aim of this work is to provide a logical account for translating ‘caste’  
99 concepts in social insects to an ontology-based data model, which can be used by  
100 researchers for describing and organizing entities belonging to non-human societies,  
101 as well as for the provision of evidential criteria for evaluating constitutive  
102 explanations of ‘social’ entities. We will adjust and refine previous propositions for a

103 ‘caste’ ontology while addressing some misconceptions made by Silva & Feitosa  
104 (2019a). We will discuss the identity of the upper-level category of the ‘caste’ entity,  
105 based on the defining properties of some continuant entities (*i.e.* material entities and  
106 realizable entities) provided by the Basic Formal Ontology (BFO) and by Vogt *et al*  
107 (2012a). Additionally, we will explore ‘caste’ concepts in insect societies using  
108 distinct frames of reference and Vogt’s (2019) domain granularity framework.

109

## 110 **Methods**

### 111 Specialized terms

112 Several terms routinely used in ontology development will be used recurrently  
113 throughout the text. We provide a brief explanation for most of them in Table 1;  
114 names available in the table will be underlined throughout the text. In this work, we  
115 will use quotation marks when referring to the name ‘caste’, in order to highlight the  
116 inappropriateness of its usage for communication in contemporary biology. We  
117 understand that reevaluating the linguistic component of terminological units<sup>1</sup> is  
118 essential for the development of a more inclusive and diverse science. We suggest that  
119 a reevaluation of this magnitude should be conducted by a diverse group of  
120 researchers through a transdisciplinary approach, which is a desirable condition  
121 needed to address linguistic modifications. Since it is not the aim of the present work  
122 to reevaluate the name usage throughout the history of the discipline, we refrain from  
123 providing an alternative term to the concept that refers to distinct categories of the  
124 phenotype in non-human societies, lest we change an oppressive-laden name by  
125 another.

126

### 127 Basic Formal Ontology for distinguishing material entities and realizable entities

128 The Basic Formal Ontology (BFO) serves as a template that defines types of  
129 entities and their divisions following a general granularity framework, providing the  
130 structure necessary for enabling cross-ontological comparability of application and  
131 domain reference ontologies (Vogt *et al.* 2012a). One of the main design principles  
132 for structuring BFO is the single inheritance model, which requires all defined  
133 categories to be disjoint and exhaustive (Vogt *et al.* 2012a), meaning that categories

---

<sup>1</sup> Here, we refer to the idea of multidimensionality of terms as understood in the Communicative Theory of Terminology (Cabr e 2003), where a terminological unit is composed of three components: linguistic, cognitive and situational.

134 must be mutually exclusive relative to a given level of granularity (Spear 2006). This  
135 means that each class of a classification has maximally one single asserted parent  
136 class (Vogt *et al.* 2011).

137 The upper-level entities provided by the BFO classification can be distinguished  
138 into two types: continuant and occurrent entities. This distinction rests on a  
139 fundamental dichotomy between space and time (Smith 2015), being sufficient  
140 insofar for organizing the main axis of upper-level ontologies.

141 One of the main attributes of occurrent entities is that they can be bona fide or fiat  
142 in nature. They can be considered as a natural unit, however, only if they are parasitic  
143 on the existence of natural units in the continuant side (Smith 2015), and hence  
144 existing independently of human mental or linguistic activities (Vogt *et al.* 2012b).  
145 We can also identify sub-processes - *i.e.* temporal parts - which are fiat segments  
146 occupying constituent temporal intervals of the temporal interval occupied by the  
147 process as a whole (Smith 2015).

148 Most natural kinds are represented by continuant entities – such as organisms,  
149 parts of organisms, biological functions, roles – with material and realizable entities  
150 being subsets of a continuant. Contrary to occurrent entities, continuants can be  
151 delimited by bona fide boundaries depending on the perspective a certain entity is  
152 analyzed (Vogt *et al.* 2012b). This is mostly the case for material entities, which can  
153 be defined by properties belonging to several frames of reference rather than  
154 exclusively through a spatio-structural demarcation (Vogt *et al.* 2012b).

155 As a subset of continuant entities, there are independent and specifically  
156 dependent entities (Figure 1A). The importance of the distinction between them is the  
157 way they are established through a relation of specific dependence. BFO establishes  
158 specific dependence as a relation that obtains between one entity and another when  
159 the first entity cannot exist unless the second entity exists also (Smith 2015). Hence, a  
160 continuant entity is dependent if, in order for it to exist, it must inhere in some other  
161 entity (Spear *et al.* 2016). This relation can be one-sided or reciprocal.

162 In the BFO template, material entities subsume objects, fiat object parts, and  
163 object aggregates (Smith 2015), which assume a three-level theory of granularity.  
164 Since this template is considered inadequate for biology, Vogt *et al.* (2012a) proposed  
165 additional types of material entities: object cluster, object group, fiat object part  
166 aggregate, fiat object part cluster, fiat object part group, object with fiat object part  
167 aggregate, object with fiat object part cluster, and object with fiat object part group.

168 Following the application of the single inheritance principle to the different  
169 sub-categories of a material entity, any given particular material entity must  
170 instantiate exactly one of the types of material entities defined for any given level of  
171 granularity (Figure 1B).

172 Dependent continuant entities are related to their bearers (*i.e.* independent  
173 continuant entities) by inherence, which in turn is defined as a one-sided existential  
174 dependence relation between two entities (Arp & Smith 2011). This means that  
175 realizable entities are only realized by some independent entity, at a particular time.  
176 The main subtypes of realizable entities are functions, roles, and dispositions (Figure  
177 1C).

178

### 179 Vogt's domain granularity framework

180 Vogt's (2019) framework provides a basis for integrating distinct granular  
181 perspectives, through the identification of a set of causal unities that act as defining  
182 properties of a given entity. The main support of Vogt's proposition rests on the  
183 BFO's definition of 'object' (Smith *et al.* 2015) – a bona fide category that exists  
184 independent of human partitioning activities as causally relatively isolated entities  
185 (Ingarden 1983; Smith & Brogaard 2003) that are both structured through and  
186 maximal relative to a certain type of causal entity.

187 In the BFO, there are three distinct types of causal unities (*i.e.* causal unity via  
188 internal physical forces, causal unity via physical covering, and causal unity via  
189 engineered assembly of components) (Smith *et al.* 2015), with Vogt (2019)  
190 suggesting two types of causal unities that are suited to cover the missing cases for the  
191 life sciences (*i.e.* causal unity via bearing a specific function and causal unity via  
192 common historical/evolutionary origin).

193 In our case, four types of causal unities can be beneficial for establishing defining  
194 properties for 'caste' concepts: causal unity via internal forces, causal unity via  
195 physical covering, causal unity via bearing a specific function, and causal unity via  
196 common historical/evolutionary origin. Both causal unity via internal physical forces  
197 and causal unity via physical covering are associated with a spatio-structural granular  
198 perspective (Smith *et al.* 2015; Arp *et al.* 2015), while the causal unity via bearing a  
199 specific function is associated with a functional granular perspective and the causal  
200 unity via common historical/evolutionary origin is associated with a  
201 historical/evolutionary granular perspective (Vogt *et al.* 2012b).



202 In cases of cross-granular instantiation, in which the studied material entities do  
203 not necessarily directly sum to one another, integration of distinct granular  
204 perspectives can also be attained with Vogt's granularity framework, through several  
205 relations of granular representations.

206 Exploring these three granular perspectives and their underlying relations of  
207 causal unity for 'caste' conceptualization is beneficial (*e.g.* Silva & Feitosa 2019a),  
208 since the entities can be explored following distinct temporal partitions - retrodictive  
209 (diachronic) in an historical/evolutionary perspective, predictive in a functional  
210 perspective, and descriptive in a spatio-structural perspective (Figure 2).

211 Another important feature of Vogt's framework rests on the assumption that the  
212 entities that compose each level of a biological hierarchy can be represented as  
213 building blocks. These building blocks are representations of biological entities which  
214 are the sum of the building blocks belonging to finer levels of biological organization.  
215 Because the concept of a building block is based on an evolutionary interpretation, it  
216 explicitly predicts the diversification of newly evolved building blocks of a given  
217 level, with each higher level exhibiting the possibility of an exponentially larger  
218 number of different types of entities associated with a building block to be  
219 evolved—the number of possible types of molecules is exponentially larger than the  
220 number of possible types of atoms (Vogt 2019). When considering that actual  
221 material entities can be composed of several possible combinations (*i.e.* aggregates)  
222 of those building blocks, the diversity of possible types of material entities increases  
223 even more with each newly evolved building block.

224

## 225 **Results**

### 226 Result I: Top-level category of 'castes'

227 'Castes' are determined during some part of the development of organisms and  
228 maintained throughout their lives (Dolezal 2019; Tribble & Kronauer 2017). The  
229 expression of a certain phenotypic trait is influenced by several processes acting in  
230 distinct levels of biological organization. Said traits can be determined equally or  
231 individually by epigenetic processes (Londe *et al* 2015), developmental and  
232 physiological determinants (Hartfelder *et al.* 2006), and/or environmental constraints  
233 (Peeters & Molet 2010). Hence, each component on a specific level of organization  
234 has a differential participation on the determination of particular 'castes'. Those  
235 components can (a) individually and directly influence the determination of the 'caste'

236 entity, or (b) synergistically operate along with other components of the same level of  
237 organization they belong to, composing a coarser level entity that, in turn, will  
238 directly influence the development of the ‘caste’ entity. For example, one species of  
239 desert ant, *Cataglyphis mauritanica* (Emery, 1906a), has a strong genetic bias to  
240 ‘caste’ development, such that, under normal circumstances, certain genotypes always  
241 develop in small workers (Trible & Kronauer 2020). However, juvenile hormone  
242 treatment causes worker-destined genotypes to develop into larger queens, while  
243 queen-destined genotypes will develop into small workers when reared in small  
244 colonies, where the larvae are likely starved (Kuhn *et al.* 2018). Hence, the  
245 determination of ‘castes’ can be directed on the genotype level in some cases, while  
246 being directed at the metabolic or environmental level in other cases.

247 At this point, it is important to make a distinction between dispositions (*i.e.*  
248 biological functions) and processes, following BFO’s template. Dispositions are  
249 exclusively described by reference to the types of process which would realize them  
250 under certain conditions (Ellis & Lierse 1994). Each disposition will exist in relation  
251 to some physical quality or qualities of its bearer; however, different quality patterns  
252 or arrangements may serve as ground under different circumstances or in different  
253 types of bearers (Spear *et al.* 2016). A biological function, as a subcategory of  
254 disposition, therefore, is realized only in reference to some type of process and  
255 performed by some material entity. Thus, one main attribute of a biological function  
256 is that, for a material entity to have the disposition to perform it does not necessarily  
257 imply that this entity is realizing this particular function at every moment in which it  
258 exists. Hence, biological functions are intimately related to the processes that realize  
259 them, but they are not identical or existentially dependent to them (Spear *et al.* 2016).

260 Processes and process boundaries, on the other hand, occupy spatiotemporal  
261 regions and they span temporal intervals and temporal instants, respectively (Smith  
262 2012). Hence, processes are temporally extended, contrary to process boundaries. In  
263 the BFO template, processes and process boundaries (and their corresponding  
264 spatiotemporal regions and temporal regions) are considered as occurrents (Figure  
265 3A). Processes are roughly defined as events that occur, unfold, happen, or develop  
266 through time, having temporal proper parts and are dependent of some continuant  
267 entity to happen (Jarrar & Ceusters 2017). Process boundaries, on the other hand,  
268 spans only zero-dimensional (*i.e.* temporal interval) and one-dimensional (*i.e.*  
269 temporal instants) temporal regions, meaning that they do not have temporal parts



270 (Jarrar & Ceusters 2017). An example of a biological process is the beating of a heart,  
271 while examples of process boundaries are the beginning and the ending of some  
272 organism's life. Temporal parts from a given process can be delimited by less  
273 inclusive process boundaries, such as the second and third years of an organism life.  
274 This type of temporal partition, however, can be problematic when we are trying to  
275 represent spatio-temporally extended entities, such as 'castes' (*cf.* Discussion I).  
276 Hence, any given material entity that is the bearer of a given function (in the form of  
277 having the disposition to perform it) participates in a given process, while the function  
278 is realized in the course of that same process (Figure 3B).

279 At some moment of their lives, particular 'castes' expressed in some individuals  
280 have the disposition to perform certain biological functions (Lillico-Ouachour &  
281 Abouheif 2017). These functions can be fixed for certain 'castes' (*e.g.* disposition for  
282 reproduction) or can be performed as a response to environmental constraints, such as  
283 local or temporal demands (*e.g.* food processing and defense behavior) (Shackleton *et*  
284 *al.* 2018; Klunk *et al.* 2020). Then again, 'castes' are expressed despite their  
285 dispositions to perform biological functions, which are considered sets of defining  
286 features for 'caste' categories rather than the 'castes' themselves.

287 Therefore, after determination, a 'caste' persists independently through time,  
288 maintaining their identity, without the necessity to establish a specific relation with  
289 another entity, determining it as independent continuant. Since 'castes' are studied  
290 and represented following distinct levels of material organization, they are  
291 categorized as material entities rather than realizable entities.

292 In short, 'castes' are phenotype categories with defining properties belonging to  
293 distinct frames of reference and granular perspectives, meaning that they are  
294 expressed during the development of an organism and maintained throughout their  
295 entire existence, being better understood and explored as material entities. To  
296 consider 'castes' as realizable entities (Silva & Feitosa 2019a) or as mechanisms  
297 (Sumner *et al.* 2018) denotes that they are expressed or organized only during some  
298 temporal partition of an organism lifespan and that this same organism has the  
299 disposition to belong to several 'castes' when certain demands compel them to, which,  
300 insofar, is not considered to be the case (*cf.* Discussion I).

301 Hence, following Vogt (2019) proposition for top-level categories of material  
302 entities, 'castes' can be considered as an 'epithelially delimited multi-cellular  
303 organism level entity' in a spatio-structural frame of reference, a 'functional unit' in a

304 functional frame of reference, and an ‘historical/evolutionary unit’ in an  
305 historical/evolutionary frame of reference.

306

### 307 Result II: Frames and granular perspectives

308 Under the top-level categories of material entities (*i.e.* objects, fiat object part,  
309 object aggregate, fiat object part aggregate, and object with fiat object part aggregate;  
310 Vogt *et al.* 2012a), ‘castes’ are objects, and their bona fide boundaries can be  
311 established in a multicellular organism level. Hence, they are instantiated by fiat  
312 object part aggregates, objects with fiat object part aggregates, and objects at finer  
313 levels of representation – such as anatomical complexes, metabolic pathways, and  
314 genetic modularity. This way, the relation of each component of the phenotype to  
315 another, during the determination of ‘castes’, can be represented through a cumulative  
316 constitutive hierarchy (*i.e.* an hierarchical relation in which the parts of a  
317 multi-cellular organism that belongs to a cut of an instance granularity tree do not all  
318 instantiate the same basic type of phenotypic entity; Vogt 2019), creating several  
319 layers of ‘caste’ expression that do not necessarily directly sum to one another.

320 Vogt (2019) proposed five basic types of granular perspectives: a Compositional  
321 Building Block (CBB), Compositional Building Block Cluster (CBB-C),  
322 Region-based, Compositional Functional Unit (CFU), and Compositional  
323 Historical/Evolutionary Unit (CH/EU) granular perspectives. When modeling ‘castes’,  
324 at least three types of granular perspectives are important to us, namely CBB, CFU,  
325 and CH/EU. The other granular perspectives will probably be useful for dealing with  
326 some specific cases in which the concept is composed by aggregates of fiat entities  
327 from finer levels.

328 The CBB granular perspective encapsulates the main organizational axis of  
329 spatio-structural material entities, holding the most prototypical building blocks:  
330 ‘atom’ < ‘molecule’ (including metals and ionic compounds) <  
331 ‘single-membrane-enclosed entity’ (*i.e.* most organelles and all prokaryotic cells) <  
332 ‘membrane-within-membrane entity’ (*i.e.* eukaryotic cell) < ‘epithelially-delimited  
333 compartment (*i.e.*, some, but not all of the entities that are commonly referred to as  
334 organs) < ‘epithelially-delimited multi-cellular organism’ (*i.e.*, organisms with an  
335 epidermis).

336 In our example, a spatio-structural worker is defined as an epithelially delimited  
337 multi-cellular organism composed by an epithelially-delimited compartment (in this

338 case, an ovary). Hence, the ovary is the direct proper part of the spatio-structural  
339 worker (Figure 4A).

340 For a CFU granular perspective, we can consider five types of upper-level  
341 categories of functional entities: (i) functional unit of locomotion, (ii) functional unit  
342 of physiology, (iii) functional unit of ecology, (iv) functional unit of development,  
343 and (v) functional unit of reproduction and propagation. Three of them (categories i, ii,  
344 and iii) are related to dispositions independent of morphogenesis – namely,  
345 locomotory and physiological dispositions - and two of them (categories iv and v) are  
346 related to a morphogenetic disposition. Under the CFU, functional units are defined  
347 by their relation with several realizable entities. In our case, a functional unit related  
348 to a ‘caste’ (such as a worker) is defined by their disposition to perform certain roles  
349 or biological functions, following their upper level functional entities. As an example,  
350 a functional worker can be defined as a functional unit of ecology, since it has  
351 disposition to perform foraging behavior (Figure 4B).

352 For a CH/EU granular perspective, we can consider five types of upper-level  
353 categories of historical/evolutionary entities: (i) historical unit of development, (ii)  
354 historical unit of heredity, (iii) developmental lineage, (iv) genealogical lineage, and  
355 (v) evolutionary lineage. Two of them (categories i and ii) are related to structural  
356 integrity and stability over time – *i.e.* developmental and heredity relations –, while  
357 three of them (categories iii, iv, and v) are related to constituent historical relations  
358 distributed in time and space. Under the CH/EU, historical/evolutionary units are  
359 defined by their relation with chemical, biological, and/or historical entities. As an  
360 example, a historical/evolutionary unit related to a ‘caste’ is defined by several  
361 referential properties which are differentially expressed along a temporal continuum.  
362 As an example, a historical/evolutionary worker can be defined as an historical unit of  
363 development, since it can be developmentally induced by a juvenile hormone (Figure  
364 4C).

365 One of the many limitations in the granularity schemes currently applied in  
366 bio-ontologies relates to the non-conformance with the reality of the biological  
367 organization of material entities (especially anatomical entities) (Vogt 2019). Since  
368 most granularity schemes applied in bio-ontologies presuppose an organization of  
369 material entities within a constitutive hierarchy, with each subcategory of a material  
370 entity standing in a direct subsumption relation to one another, the instance  
371 granularity tree will be directly translated into a type granularity tree. However,

372 biological material entities are most possibly organized according to a cumulative  
373 constitutive hierarchy (Valentine & May 1996; Valentine 2004; Jagers Op Akkerhuis  
374 2008).

375 When deriving granularity trees under a cumulative constitutive hierarchy, the  
376 mereological sum of all entities belonging to one instance granularity level does not  
377 necessarily sum to its unpartitioned whole, since the parts of a multi-cellular organism  
378 that belong to a cut of an instance granularity tree do not all instantiate the same basic  
379 type of anatomical entity (see Figure 2B, right, in Vogt 2019). Hence, the translation  
380 process of an instance granularity tree into a type granularity tree under a cumulative  
381 constitutive hierarchy is not necessarily straightforward. However, applying Vogt's  
382 (2019) sortation-by-type approach we can more easily derive type granularity trees of  
383 biological material entities.

384 For example, one can model several instances of a 'worker' entity in distinct  
385 granular perspectives through cross-granular representations (Figure 5). When  
386 integrating distinct representations of the same biological entity, in distinct frames of  
387 reference, we can sort them through relations of granular representation. If we are  
388 interested, for instance, in integrating the distinct subcategories of 'workers'  
389 represented in distinct frames of reference (spatio-structural, functional and  
390 historical/evolutionary), the spatio-structural representation can be logically integrated  
391 with both the functional representation and the historical/evolutionary representation,  
392 each belonging to their respective granular perspective (F-BR and H/E-BR), through  
393 relations of specific granular representations (has functional granular representation  
394 and has historical/evolutionary granular representation; Figure 5.A and Figure 5.B,  
395 respectively).

396 Building blocks that belong to finer levels in a CBB granular perspective can also  
397 be translated to other granular perspectives through granular relations. Hence, a gonad  
398 (or, more specifically in our case, an ovary) can be translated to a F-BR perspective  
399 through a granular relation of has functional granular representation, for example,  
400 being represented as a functional unit of reproduction and propagation in a functional  
401 frame of reference, having the disposition to perform some reproductive process.

402 Another important aspect of modeling biological data following granular  
403 perspectives is that any given biological material entity always instantiates several  
404 different material entity categories at the same time, one for each spatio-structural  
405 frame of reference (Vogt *et al.* 2012a). When building blocks are composed of

406 aggregates or clusters of other entities, whether they possess bona fide or fiat  
407 boundaries in their respective granular perspective, they can be sorted through  
408 additional granular perspectives.

409 In the case of region-based granular perspectives (*i.e.* building block cluster,  
410 building block part, fiat building block aggregate, fiat building block part, fiat  
411 building block cluster, group of building block level objects, and fiat building block  
412 level entities), distinct perspectives can be sorted through proper parthood relations,  
413 sharing the same non-scale dependent single-relation-type (nrG) granularity type  
414 (Vogt 2019). According to Keet (2008), the nrG granularity type is a qualitative type  
415 of granularity that provides ordering of non-scale-dependent levels through a  
416 combination of properties where level identification is less straightforward. One  
417 distinguishing feature of the nrG granularity type is that it provides semantic  
418 aggregation (Keet 2008), defined as the combination of two or more semantic entities  
419 into one (Wilkinson 1995; Reape & Mellish 1999). Hence, when describing any set of  
420 region-based granular perspectives, the relations between the building blocks  
421 belonging to distinct granular perspectives can be logically and unambiguously sorted  
422 to a type granularity tree.

423 As two examples within our case study, we have the ‘female genitalia’ and the  
424 ‘gonadal tube’ of insect organisms in our granular perspective tree (Figure 5). The  
425 first occupy a region-based fiat building block aggregate granular perspective (Figure  
426 5C), while the second occupy a region-based building block cluster granular  
427 perspective (Figure 5E), with each one being sorted to the corresponding level in a  
428 CBB granular perspective through their respective proper parthood relation (*i.e.* has  
429 proper part and proper part of).

430

### 431 Result III: Reasoning limitations

432 Although cross-granulation can be logically established following a domain  
433 granularity framework for life sciences, we still have some pressing issues relating to  
434 reasoning of data models (Mabee et al. 2020). To this date, ontology-based  
435 multi-species data models did not explicitly incorporated other frames of reference  
436 apart from a spatio-structural frame, providing only partial inventories of biological  
437 systems. However, with the growing need of logically modeling biological data in a  
438 cross-domain framework, aiming for a more throughout logical representation of  
439 biological systems, researchers found the necessity to explore reasoning ramifications

440 of logical models that accommodated distinct frames within data models and data  
441 repositories (Mabee et al 2020).

442 Reasoning in ontology and knowledge bases roughly translates to the derivation  
443 of facts that are not explicitly expressed in said structures. Ontology reasoning is  
444 important because it enables designing and maintaining high quality models, enabling  
445 queries over ontology classes and their respective instances deposited at knowledge  
446 bases and makes the integration and alignment of multiple ontologies possible (Keet  
447 2020). The process of automated reasoning (or simply reasoning) is made by  
448 softwares called reasoners.

449 Reasoners derive facts from different types of statements, usually from universal  
450 and/or particular statements. A set of universal statements comprise what is called a  
451 Terminological Box (TBox), while a set of particular statements is called an Assertion  
452 Box (ABox). In this sense, ontologies are composed of TBox expressions, while  
453 knowledge bases are composed of TBox and ABox expressions (De Giacomo &  
454 Lenzerini 1996). It is important that ontologies should be restricted to universal  
455 statements (TBox expressions), including terminological statements as metadata, with  
456 assertional and contingent statements (ABox expressions) being dealt in separate  
457 data repositories (Schulz & Jansen 2013), because the main objective of an ontology  
458 is to model statements that are universally true for all instances of a certain type of  
459 particular (Vogt & Bartolomaeus 2019).

460 According to Keet (2008), the current automated reasoners used in ontologies do  
461 not necessarily assume properly defined taxonomies of part-whole relations, since  
462 they only take into account the syntax of the relation-subrelation and do not consider  
463 the domain and range restrictions, nor the relational properties within the proposed  
464 taxonomy.

465 The most commonly used reasoner for bio-ontologies has been ELK, an OWL 2  
466 EL compliant reasoner used to infer logical consequences in ontologies that have a  
467 large number of classes and/or properties. However, ELK follows a particular profile  
468 that is not suitable for modeling tasks in cross-domain ontologies, despite aiming for  
469 scalability. For example, the ELK reasoner does not support intransitive part-whole  
470 relations (*i.e.* despite  $x$  having a direct relation  $R$  to  $y$  and  $y$  having a direct relation  $R$   
471 to  $z$ ,  $x$  and  $z$  will not have a direct relation  $R$  to one another:  $\forall(x,y: Rxy) \forall(z: Ryz)$   
472  $\neg Rxz$ ), which is a necessary conditions for partial ordering in data models that apply  
473 distinct granular perspectives.



474 One important issue that must be considered is that intransitive relations cannot  
475 be explicitly represented in OWL and the process of not asserting transitivity in this  
476 context means that a property is non-transitive (*i.e.* transitive in certain occasions and  
477 intransitive in others) and not necessarily intransitive (Keet 2014). It is important to  
478 notice that some types of biological entities can establish intransitive relations with  
479 other types of biological entities in specific circumstances (Guizzardi 2009; Vogt  
480 2019) and ontologies that possess these types of relations are not necessarily  
481 ontologically flawed.

482 Hence, it is important that advances in reasoning architecture and inference rules  
483 are made in order to validate biologically coherent ontologies while maintaining  
484 ontological correctness. If we aim to model data following multiple frames of  
485 reference within a multi-domain ontology, we must explore alternatives for current  
486 reasoning practices. There will be always a trade-off, however, in expressiveness and  
487 applicability of logical reasoners that must be considered when modeling large-scale  
488 data structures (Mabee *et al.* 2020).

489

## 490 **Discussion**

### 491 Discussion I: Importance of defining ‘castes’ as material entities

492 Bio-ontologies are important and useful tools not only in the standardization of  
493 data and metadata, but also in data integration, data compatibility and comparability,  
494 and for data communication and management (Vogt *et al.* 2011). However, since  
495 several ontologies have been developed with a particular practical purpose in mind  
496 (*e.g.* Silva & Feitosa 2019a and this work), with a focus on the definition for very  
497 specialized types of entities, definitions for general types of entities are normally  
498 lacking. This normally leads to ontological inconsistency and cross-ontology  
499 incompatibility. Following an ontologically consistent framework for defining  
500 top-level categories in application oriented ontologies is important for enabling  
501 cross-ontological compatibility, also enhancing interoperability in future applications.

502 Another important point in defining ‘castes’ as top-level material entities is that,  
503 in this way, we can provide a conceptual framework for debates of downward  
504 causation on ‘caste’ expression (Craver & Bechtel 2007), since it is considered that all  
505 individuals in a colony share the same genetic background and that ‘caste’  
506 differentiation derives from differences in gene expression (Crozier & Pamilo 1996;  
507 Elsner *et al.* 2018). Hence, reproductive disposition is considered to be decoupled

508 from ‘caste’ expression in social insects. For example, in some groups of termites  
509 workers have the disposition to give birth in situations in which primary reproductives  
510 are absent (Korb & Hartfelder 2008; Korb 2015; Leniaud *et al* 2011). A similar case  
511 occurs in the ant genus *Dinoponera* Roger, 1861, although, in this case, the queen  
512 ‘caste’ is completely absent and reproductive workers (called *gamergates*) establish a  
513 relation of reproductive dominance among them (Peeters 1997). In these cases,  
514 historical/evolutionary (*e.g.* phenotype loss), ecological (*e.g.* relations of intracolony  
515 dominance) and environmental (*e.g.* nest degradation or absence of food resources)  
516 factors may trigger reproductive disposition in workers.

517 Then again, due to the richness of functional dispositions of ‘caste’ entities,  
518 conceptualization under a functional frame of reference must be accounted for, when  
519 possible. As complex systems, social insects have the disposition to perform a series  
520 of intricate biological processes, which may vary and can be coupled to distinct  
521 ‘castes’. For example, Neves *et al.* (2017) observed that, in some species of ants  
522 (more precisely, in *Pheidole rudigenis* Emery, 1906b) there appears to be a higher  
523 variability in activity patterns due to the presence of more-than-one non-reproductive  
524 ‘caste’ (namely, soldiers/majors and workers/minors), while in species with only one  
525 non-reproductive ‘caste’ [*Gnamptogenys striatula* Mayr, 1884 and *Linepithema*  
526 *micans* (Forel, 1908)] activity patterns were less variable and more predictable.  
527 More-than-one non-reproductive ‘castes’ appears to be coupled, at least to some  
528 degree, to specific dispositions, such as performance of defensive or aggressive  
529 behaviors (Wu *et al.* 2018; Grüter *et al.* 2017). Although recognizing ‘castes’ by a set  
530 of functionally defined spatio-structural entities can be problematic (see discussion  
531 below), descriptive accounts of specific functionalities in certain ‘castes’ are  
532 extremely important for providing a robust framework for external explanatory  
533 accounts of complexity and, therefore, should be considered during modeling  
534 procedures.

535 There are, however, some limitations when describing ‘castes’ exclusively  
536 through functional or historical/evolutionary frames of reference. One prominent  
537 example refers to the concept of ‘temporal castes’ proposed by Wilson (1979).  
538 According to Wilson’s proposition, a ‘caste’ would be an ensemble of colony  
539 members that specialize on particular tasks for prolonged periods of time, being  
540 typically (but not necessarily) distinguished by other genetic, anatomical, or  
541 physiological traits. He further categorizes ‘castes’ in two subcategories, namely

542 ‘physical castes’ and ‘temporal castes’, with the former being defined by allometric  
543 and other anatomic criteria and the latter being defined by age grouping. There are  
544 several ontological limitations in Wilson’s proposition: (i) the top-level category of  
545 ‘caste’ used to subsume other finer categories of ‘caste’; (ii) fortuitous categorical  
546 errors in Wilson’s framework; (iii) misconceptions of the principle of persistence that  
547 allows the delineation of groups of temporal entities in Wilson’s framework.

548 Relating to the first issue, Wilson assumes ‘castes’ as object aggregates (*i.e.* a  
549 group of bona fide epithelially delimited multicellular organisms) that are recognized  
550 by a set of functionally defined spatio-structural entities (*i.e.* anatomic distinct  
551 individuals that have the disposition to perform specific biological functions).  
552 However, recognition criteria of functionally defined spatio-structural entities cannot  
553 be directly inferred from their defining properties (*i.e.* dispositions), because said  
554 properties are not usually unambiguously bound to a specific set of spatio-structural  
555 properties (Vogt & Bartolomaeus 2019). According to Peeters (2012), certain groups  
556 of social insects possess this characteristic uncoupling of disposition (in his example,  
557 reproductive disposition) from a specific set of spatio-structural properties (*e.g.*  
558 development of morphoanatomical components associated with wings). Hence,  
559 recognizing ‘castes’ by a set of functionally defined spatio-structural entities  
560 constrains coherent accommodation of new findings relating to ‘caste’ expression and  
561 leads to the accretion of unnested categories in the classification (see further  
562 discussion below).

563 Wilson’s second issue is, potentially, the most problematic one among the three  
564 of them, because it involves some misconceptions on the types of reasoning used in  
565 the process of proposing explanatory (retrodictive) accounts of evolutionary origin for  
566 ‘caste’ entities and the process of proposing predictive accounts of functional  
567 dispositions for ‘caste’ entities, while making several category mistakes when trying  
568 to translate these propositions of ‘caste’ expression to classificatory schemes. The  
569 author explores several underlying processes that explain how insect ‘castes’ are  
570 differentially expressed through the lifespan of a multicellular organism (*i.e.* age  
571 polyethism). In this process, he employs several types of biological entities, belonging  
572 to distinct frames of reference, in order to establish relations of causal unity between  
573 said entities that led to the expression and evolution of ‘temporal castes’. When  
574 translating his explanations to a classificatory scheme, Wilson allocates entities  
575 belonging to one frame of reference to another, or allocates the same entity into two

576 distinct frames. Superseding distinct frames of reference during description normally  
577 determines conceptual inconsistency, derived from category mistakes. Since each  
578 frame of reference virtually partitions the underlying biological entity in its own  
579 particular way, descriptions of the same phenotype that are based on different frames  
580 of reference often result in incongruent partitions (Vogt 2019). In our urge to provide  
581 a classificatory scheme that serve as a backbone to several explanatory claims, we  
582 normally mix up our descriptive demands with our explanatory demands.

583 Relating to Wilson's third issue, modeling concepts under a temporal continuum  
584 can be challenging and can inevitably lead us to proposing inconsistent categories.  
585 Different from spatio-structural entities, temporal entities cannot be directly and  
586 easily determined because their corresponding boundaries are not necessarily  
587 mind-independent, although they can be considered as bona fide entities in a given  
588 temporal perspective. Although discussions relating to temporal boundariness extends  
589 beyond the scope of this work, it is important to mention that, in order to recognize  
590 categories of temporal entities, one must assume that time has four basic distinct  
591 properties, according to Galton (2011), which it shares – to various degrees – with  
592 space: extension, linearity, directionality, and transience. An additional property of  
593 time relates to continuity, which presupposes extension, thus enabling the mapping of  
594 temporal-bounded biological entities to a spatio-structural frame of reference  
595 (although the mapping is not completely straightforward; *cf.* Vogt *et al.* 2012b for a  
596 throughout discussion on the matter). Each one of these properties presupposes  
597 another; extension presupposes linearity (*i.e.* time cannot be linear without being  
598 extended), linearity presupposes directionality (*i.e.* time cannot be directed without  
599 being linear), and directionality presupposes transience (*i.e.* time cannot be transient  
600 without being directed) (Galton 2011). In this sense, Wilson's proposition does not  
601 account for individual variation in a temporal continuum, but instead consider the  
602 temporal 'castes' (*i.e.* age cohort) as temporal scattered entities, in the form of fiat  
603 spatiotemporal regions, establishing some temporal instants that serve as partial fiat  
604 boundaries without taking into account the continuity property contemplated within  
605 their underlying temporal interval. Then, he fails to provide an account of  
606 connectedness that would enable the extension of said temporal scattered entities  
607 through time. Although temporal entities are inherently delimited by fiat boundaries  
608 to some extent, they can retain their bona fideness if their defining properties are  
609 properly accounted for. Wilson's third issue can be resolved if we represent temporal

610 variation in the form of ‘castes’ as historical units of development within an  
611 historical/evolutionary frame of reference, instead of arbitrarily partitioning ‘castes’ in  
612 age cohorts.

613

614 Discussion II: Accommodating discoveries in the ‘caste’ data model and a brief  
615 discussion on ‘subcastes’

616 Since the present data model is based on a domain granularity framework for the  
617 life sciences, all theoretically possible types of combinations of building blocks are  
618 covered (Vogt *et al.* 2011; Vogt 2019). Even if discoveries on ‘caste’ expression are  
619 made, this framework enables the reevaluation and evolution of concepts, attribution  
620 of new concepts and adjustments of available entities. Considering the major  
621 knowledge gap we have in understanding the drivers of ‘caste’ development and  
622 evolution, along with the huge advances we had in the past few years in fields like  
623 eco-evo-devo and thanks to the use of new high-throughput technologies, a versatile  
624 yet coherent framework helps us describe and accommodate new findings.

625 Another important benefit of using building blocks to model ‘caste’ concepts is  
626 its versatility when mapping entities to distinct frames of reference, without failing  
627 formal axioms. This is particularly important if we consider the wide range of  
628 possible dispositions and putative origins for each ‘caste’ entity and their underlying  
629 analytic value in machine-oriented applications. Each new finding can be  
630 accommodated to models if the structure of the ontology is based on these building  
631 blocks.

632 In groups that express intermediate or phenotypic mosaics, or have disposition to  
633 perform some specific functions or roles within a colonial environment (such as  
634 foragers, nurses, soldiers in bees, ants and termites), it is common to attribute a  
635 subcategory within the ‘caste’ concept, namely a ‘subcaste’. In a tentative ontological  
636 framework, Silva & Feitosa (2019a) suggested that ‘subcastes’ can be defined as  
637 subcategories of ‘caste’ concepts. However, what is considered to be a ‘caste’ and a  
638 ‘subcaste’ sometimes depends on pragmatic reasons. If the ‘subcaste’ inherits all  
639 properties of its parent ‘caste’ and adds new defining properties and thus narrows in  
640 the meaning of the term, it truly represent a subclass of the former and, thus, could be  
641 argued to represent a ‘subcaste’ independent of our classification attempts.

642

643 Discussion III: Current limitations and further improvements

644 One limitation of the proposition for a ‘caste’ ontology relates to its specificity  
645 and small size. Since usage of ‘caste’ concepts is oriented to a small niche of  
646 researchers, an ontology will provide support only for particular set of demands.  
647 Nonetheless, due to an increase in complexity of the defining criteria needed to  
648 represent ‘castes’, establishing coherent sets of categories of ‘castes’ has been  
649 increasingly challenging. Alternatives to an ontology of ‘castes’ would be the  
650 description of individuals through knowledge bases using RDF specifications,  
651 contemplating several frames of reference, or the complete abandonment of the notion  
652 of ‘castes’ from insect societies. We believe, however, that the latter proposition is  
653 radical, to say the least; ‘caste’ concepts provide researchers with the much needed  
654 ontic support to provide explanatory accounts for spatio-structural, functional and  
655 historical/evolutionary variation and the complete abandonment of the idea would be  
656 uncalled for.

657 Further studies on category mistakes would be important to elucidate the causes  
658 of errors in attribution and their corresponding consequences in inferential processes  
659 in disciplines that use ‘caste’ concepts as analytical categories or as support assertions.  
660 Category mistakes can lead to problematic assertions, especially in situations that  
661 biological entities are understood and explored in more-than-one frame of reference;  
662 this can directly affect how underlying phenomena, such as functionality or  
663 evolutionary history, in biological entities are understood.

664 Another important limitation that needs to be stressed is the virtual absence of  
665 adequate reasoners to accurately infer logical consequences from intransitive axioms.  
666 Despite the expressiveness of OWL languages, especially in existential logics, they do  
667 not provide enough support for inferring logical consequences from  
668 cumulative-constitutive hierarchies. As discussed above, several biological entities are  
669 related in an intransitive manner, especially in particular granular perspectives, which  
670 are not contemplated in OWL formalisms. TBox reasoning does not have extensive or  
671 in-depth exploration when bio-ontologies are concerned; most works superficially  
672 mention which types of reasoners were used to validate ontology structure (Meehan  
673 *et al* 2011; Silva & Feitosa 2019b), while others briefly discuss some restrictions  
674 while evaluating bio-ontology consistency (Mungall *et al.* 2012), with only Dentler *et*  
675 *al.* (2011) providing a more in-depth survey and comparison of reasoners that succeed  
676 in classifying large biomedical ontologies. Normally, works have been made in  
677 reasoning over bio-ontologies, trying to improve reasoner efficiency while inferring



678 logical consequences in knowledge bases (Balhoff *et al.* 2014, 2018; Mabee *et al.*  
679 2020; Blondé *et al.* 2011). Future efforts in reasoners development should be made  
680 considering specific characteristics of biological entities.

681

## 682 **Conclusion**

683 Using a well-defined framework to organize ‘caste’ concepts enables coherent  
684 representation of several dimensions of biological reality. Although future efforts are  
685 needed to address specific issues in ‘caste’ modeling in the bio-ontology format, the  
686 establishment of biological aligned framework is a major step forward in dealing with  
687 much of the inconsistency pertaining ‘caste’ conceptualization.

688

689

## 690 **Acknowledgements**

691 The authors are deeply indebted to Alexandre Casadei Ferreira, Natalia Ladino,  
692 Mila F. O. Martins, Paloma L. Andrade, and Tainara T. Jory, who provided  
693 suggestions and discussions on the content of this manuscript. We are deeply grateful  
694 to Lars Vogt, who pointed out several inconsistencies in the 2019a work, leading to  
695 the development of this document. TSRS was funded by CAPES and Fundação  
696 Araucária (process number 88887.354448/2019-00).

697

698

699 **References**

- 700 Arp, R., Smith, B. (2011) Realizable entities in basic formal ontology. In: Nature  
701 proceedings, <http://ontology.buffalo.edu/smith/articles/realizables.pdf>
- 702 Arp R, Smith B, Spear AD. (2015) Building ontologies with basic formal ontology.  
703 Cambridge, Massachusetts: The MIT Press. p. 248.
- 704 Balhoff JP, Dececchi TA, Mabee PM, Lapp H. (2014). Presence-absence reasoning  
705 for evolutionary phenotypes. arXiv preprint arXiv:1410.3862. 2014 Oct 14.
- 706 Balhoff, J. P., Good, B., Carbon, S., & Mungall, C. (2018). Arachne: an OWL RL  
707 Reasoner Applied to Gene Ontology Causal Activity Models (and Beyond). In  
708 International Semantic Web Conference (P&D/Industry/BlueSky).
- 709 Blondé, W., Mironov, V., Venkatesan, A., Antezana, E., De Baets, B., & Kuiper, M.  
710 (2011). Reasoning with bio-ontologies: using relational closure rules to enable  
711 practical querying. *Bioinformatics*, 27(11), 1562-1568.
- 712 Brooks, D. S., DiFrisco, J., & Wimsatt, W. C. (2021). Levels of organization: the  
713 architecture of the scientific image. In: Brooks, D. S., DiFrisco, J. & Wimsatt, W.C.  
714 *Levels of Organization in the Biological Sciences*. MIT Press, Cambridge.
- 715 Cabré, M. T. (2003). Theories of terminology: Their description, prescription and  
716 explanation. *Terminology*, 9(2), 163-199.
- 717 Costa, J. T., & Fitzgerald, T. D. (1996). Developments in social terminology:  
718 semantic battles in a conceptual war. *Trends in Ecology & Evolution*, 11(7), 285-289.
- 719 Costa, J. T., & Fitzgerald, T. D. (2005). Social terminology revisited: Where are we  
720 ten years later?. In *Annales Zoologici Fennici* (Vol. 42, No. 6, pp. 559-564). Finnish  
721 Zoological and Botanical Publishing Board.
- 722 Craver CF, Bechtel W. (2007) Top-down causation without top-down causes. *Biol*  
723 *Philos.*, 22:547–63.
- 724 Crespi, B. J., & Yanega, D. (1995). The definition of eusociality. *Behavioral Ecology*,  
725 6(1), 109-115.

- 726 Crozier, R.H., and Pamilo, P. (1996). *Evolution of Social Insect Colonies: Sex*  
727 *Allocation and Kin Selection* (Oxford: Oxford University Press).
- 728 De Giacomo, G., & Lenzerini, M. (1996). TBox and ABox reasoning in expressive  
729 description logics. *KR*, 96(316-327), 10.
- 730 Dentler K, Cornet R, Ten Teije A, De Keizer N. (2011) Comparison of reasoners for  
731 large ontologies in the OWL 2 EL profile. *Semantic Web*. 2011 Jan 1;2(2):71-87.
- 732 Dew, R. M., Tierney, S. M., & Schwarz, M. P. (2016). Social evolution and casteless  
733 societies: needs for new terminology and a new evolutionary focus. *Insectes Sociaux*,  
734 63(1), 5-14.
- 735 Dolezal, A. G. (2019). Caste determination in arthropods. In: *Encyclopedia of Animal*  
736 *Behavior* (pp. 691-698). Elsevier.
- 737 Ellis, B. & Liese C. (1994). Dispositional essentialism. *Australasian Journal of*  
738 *Philosophy*, 72(1), 27–45.
- 739 Elsner D, Meusemann K, Korb J. (2018) Longevity and transposon defense, the case  
740 of termite reproductives. *Proc Natl Acad Sci U S A.*, 115:5504–9.
- 741 Emery, C. (1906a). Rassegna critica delle specie paleartiche del genere  
742 *Myrmecocystus*. *Memorie della Reale Accademia delle Scienze dell'Istituto di*  
743 *Bologna* (6)3:47-61 [pagination of separate: 173-187].
- 744 Emery, C. (1906b). Studi sulle formiche della fauna neotropica. XXVI. *Bullettino*  
745 *della Società Entomologica Italiana* 37:107-194.
- 746 Epstein, M. (2012). Nomenclature, terminology and language. *Bionomina*, 5(1), 1-56.
- 747 Eronen MI. (2013) No levels, no problems: downward causation in neuroscience.  
748 *Philos Sci.*, 80:1042–52.
- 749 Faber, P. (2015). Frames as a framework for terminology. *Handbook of terminology*,  
750 1(14), 14-33.

- 751 Faber, P. & León-Araúz, P. (2016) Bridging the Gap between Description and  
752 Standardization: a Frame-based Version of NATO Glossaries. In Proceedings of the  
753 XVII EURALEX International Congress. Lexicography and Linguistic Diversity,  
754 edited by Margalitadze, T. & Meladze, G., pages 499-508. Tbilisi: Ivane Javakhishvili  
755 Tbilisi University Press.
- 756 Forel, A. (1908). Ameisen aus Sao Paulo (Brasilien), Paraguay etc. gesammelt von  
757 Prof. Herm. v. Ihering, Dr. Lutz, Dr. Fiebrig, etc. Verhandlungen der  
758 Kaiserlich-Königlichen Zoologisch-Botanischen Gesellschaft in Wien 58:340-418.
- 759 Galton, A. (2011). Time flies but space does not: Limits to the spatialisation of time.  
760 *Journal of Pragmatics*, 43, 695–703.
- 761 Grüter, C., Segers, F. H., Menezes, C., Vollet-Neto, A., Falcón, T., von Zuben, L., ...  
762 & Almeida, E. A. (2017). Repeated evolution of soldier sub-castes suggests  
763 parasitism drives social complexity in stingless bees. *Nature communications*, 8(1),  
764 1-8.
- 765 Guizzardi, G. (2009). The problem of transitivity of part-whole relations in conceptual  
766 modeling revisited. In *International Conference on Advanced Information Systems*  
767 *Engineering* (pp. 94-109). Springer, Berlin, Heidelberg.
- 768 Hartfelder, K., Makert, G. R., Judice, C. C., Pereira, G. A., Santana, W. C., Dallacqua,  
769 R., & Bitondi, M. M. (2006). Physiological and genetic mechanisms underlying caste  
770 development, reproduction and division of labor in stingless bees. *Apidologie*, 37(2),  
771 144-163.
- 772 Heylighen, F. (2000). Evolutionary Transitions: how do levels of complexity emerge?.  
773 *COMPLEXITY-NEW YORK-*, 6(1), 53-57.
- 774 Ingarden R. (1983) *Man and value*. München: Philosophia Verlag GmbH. p. 184.
- 775 Jagers Op Akkerhuis, G.A.J.M. (2008) Analysing hierarchy in the organization of  
776 biological and physical systems. *Biological Reviews of the Cambridge Philosophical*  
777 *Society* 83(1): 1–12.

- 778 Jarrar, M, & Ceusters, W. (2017) Classifying processes and basic formal ontology. In:  
779 ICBO 2017. Available at: [http://ceur-ws.org/Vol-2137/paper\\_14.pdf](http://ceur-ws.org/Vol-2137/paper_14.pdf)
- 780 Keet CM (2008) A formal theory of granularity - toward enhancing biological and  
781 applied life sciences information system with granularity. Bozen: Free University of  
782 Bozen - Bolzano. Available at  
783 [http://www.meteck.org/files/AFormalTheoryOfGranularity\\_CMK08.pdf](http://www.meteck.org/files/AFormalTheoryOfGranularity_CMK08.pdf).
- 784 Keet, C. M. (2014). Preventing, detecting, and revising flaws in object property  
785 expressions. *Journal on Data Semantics*, 3(3), 189-206.
- 786 Keet, C.M. 2020. An introduction to ontology engineering. [Online]. Version 1.5.  
787 [Accessed 13 April 2021]. Available from:  
788 <https://people.cs.uct.ac.za/~mkeet/files/OEbook.pdf>
- 789 Klunk C.L., Argenta M.A., Casadei-Ferreira A., Economo E.P., Pie M.R. (2020)  
790 Mandibular morphology, task specialization, and bite mechanics in Pheidole ants  
791 (Hymenoptera: Formicidae) bioRxiv. 11.16.385393 doi:  
792 <https://doi.org/10.1101/2020.11.16.385393>
- 793 Korb J. (2015) A central regulator of termite caste polyphenism. *Adv Insect Physiol.*  
794 83:295–313.
- 795 Korb J & Hartfelder K. (2008) Life history and development-a framework for  
796 understanding developmental plasticity in lower termites. *Biol Rev.* 83:295–313.
- 797 Korn, R. W. (2005). The emergence principle in biological hierarchies. *Biology and*  
798 *Philosophy*, 20(1), 137-151.
- 799 Kuhn, A., Darras, H., & Aron, S. (2018). Phenotypic plasticity in an ant with strong  
800 caste–genotype association. *Biology letters*, 14(1), 20170705.
- 801 Leniaud L, Darrouzet E, Dedeine F, Ahn K, Huang Z, Bagnères AG. (2011)  
802 Ontogenic potentialities of the worker caste in two sympatric subterranean termites in  
803 France. *Evol Dev.* 13:138–48

- 804 Lillico-Ouachour, A., & Abouheif, E. (2017). Regulation, development, and evolution  
805 of caste ratios in the hyperdiverse ant genus *Pheidole*. *Current opinion in insect*  
806 *science*, 19, 43-51.
- 807 List, C. (2019). Levels: descriptive, explanatory, and ontological. *Noûs*, 53(4),  
808 852-883.
- 809 Londe, S., Monnin, T., Cornette, R., Debat, V., Fisher, B. L., & Molet, M. (2015).  
810 Phenotypic plasticity and modularity allow for the production of novel mosaic  
811 phenotypes in ants. *Evodevo*, 6(1), 1-15.
- 812 Mabee PM, Balhoff JP, Dahdul WM, Lapp H, Mungall CJ, Vision TJ. A logical  
813 model of homology for comparative biology. *Systematic biology*. 2020 Mar  
814 1;69(2):345-62.
- 815 Magidor, O (2019) Category Mistakes, *The Stanford Encyclopedia of Philosophy*  
816 (Winter 2020 Edition). Acessado em: 28/04/2021. Disponível em:  
817 <https://plato.stanford.edu/archives/win2020/entries/category-mistakes>.
- 818 Mayr, G. (1884). [Untitled. Descriptions of eight new species.]. Pp. 31-38 in:  
819 Radoszkowsky, O. 1884. *Fourmis de Cayenne Française*. *Trudy Russkago*  
820 *Entomologicheskago Obshchestva* 18:30-39.
- 821 Meehan, T. F., Masci, A. M., Abdulla, A., Cowell, L. G., Blake, J. A., Mungall, C. J.,  
822 & Diehl, A. D. (2011). Logical development of the cell ontology. *BMC*  
823 *bioinformatics*, 12(1), 1-12.
- 824 Michener CD (1974) *The social behavior of the bees*. Harvard University Press,  
825 Cambridge
- 826 Molet, M., Wheeler, D. & C. Peeters (2012). Evolution of novel mosaic castes in  
827 ants: Modularity, phenotypic plasticity, and colonial buffering. *The American*  
828 *Naturalist* 180: 328-341.
- 829 Mungall CJ, Torniai C, Gkoutos GV, Lewis SE, Haendel MA. (2012) Uberon, an  
830 integrative multi-species anatomy ontology. *Genome biology*. 13(1):1-20.



- 831 Neco, L. C., Japyassú, H. F., El-Hani, C. N., & Châline, N. (2018). From  
832 classificatory to quantitative concepts in the study of sociality in animals: an  
833 epistemological view. *Biological Theory*, 13(3), 180-189.
- 834 Neves, F. M., Viana, R. L., & Pie, M. R. (2017). Recurrence analysis of ant activity  
835 patterns. *PloS one*, 12(10), e0185968.
- 836 Novikoff, A. B. (1945). The concept of integrative levels and biology. *Science*,  
837 101(2618), 209-215.
- 838 Peeters C. (1997). Morphologically primitive ants: comparative review of social  
839 characters, and the importance of queen-worker dimorphism. In: Choe JC, Crespi BJ,  
840 eds. *The evolution of social behavior in insects and arachnids*. Cambridge: Cambridge  
841 University Press, 372–391.
- 842 Peeters, C. (2012). Convergent evolution of wingless reproductives across all  
843 subfamilies of ants, and sporadic loss of winged queens (Hymenoptera: Formicidae).  
844 *Myrmecological News*, 16, 75-91.
- 845 Peeters, C. & Molet, M. 2010. Colonial reproduction and life histories. pp. 159-176 In:  
846 *Ant Ecology* (eds L. Lach, C. Parr and K. Abbott). Oxford University Press.
- 847 Reape, M. & Mellish, C. (1999) Just what is aggregation anyway? In: *Proceedings of*  
848 *the European Workshop on Natural Language Generation (EWNLG 1999)*, Toulouse,  
849 France, pp. 20–29.
- 850 Roger, J. (1861). Die *Ponera*-artigen Ameisen (Schluss). *Berliner Entomologische*  
851 *Zeitschrift* 5:1-54.
- 852 Rosse C, Mejino JL, Modayur BR, Jakobovits R, Hinshaw KP, et al. (1998).  
853 Motivation and organizational principles for anatomical knowledge representation:  
854 the digital anatomist symbolic knowledge base. *J Am Med Inform Assoc*. 5:17–40.
- 855 Ryle, G. (2009) *The Concept of Mind*. 60<sup>th</sup> Anniversary Edition. London: Routledge.
- 856 Schaffer J. (2003) Is there a fundamental level? *Noûs*, 37:498–517

- 857 Schulz, S. & Jansen, L. (2013) “Formal ontologies in biomedical knowledge  
858 representation,” *IMIA Yearbook of medical informatics* 2013, vol. 8, no. 1, pp. 132–  
859 46.
- 860 Shackleton, K., Alves, D. A., & Ratnieks, F. L. (2018). Organization enhances  
861 collective vigilance in the hovering guards of *Tetragonisca angustula* bees.  
862 *Behavioral Ecology*, 29(5), 1105-1112.
- 863 Silva, T.S.R. & Feitosa R.M. (2019a). On titles and royalty: a terminological  
864 discussion over castes in myrmecology. *Insectes sociaux*, 66(1): 25-35.
- 865 Silva, T.S.R. & Feitosa, R. M. (2019b). Using controlled vocabularies in anatomical  
866 terminology: a case study with *Strumigenys* (Hymenoptera: Formicidae). *Arthropod*  
867 *structure & development*, 52, 100877.
- 868 Simon H. (1962) The architecture of complexity. *Proc Am Philos Soc.*106:467–82.
- 869 Smith B. (2003) Ontology. In: Floridi L, editor. *Blackwell guide to the philosophy of*  
870 *computing and information*. Oxford: Blackwell Publishing. p. 155–66.
- 871 Smith B. (2012) *Classifying Processes: An Essay in Applied Ontology*. *Ratio*, 25:4,  
872 463-488
- 873 Smith B, Brogaard B. (2003) Sixteen days. *J Med Philos.*, 28:45–78.
- 874 Smith, B. (2015). *Basic Formal Ontology 2.0: Specification and user’s guide*.  
875 Available at: <https://github.com/bfo-ontology/BFO/wiki>. Accessed at: 18.v.2021.
- 876 Smith B, Almeida M, Bona J, Brochhausen M, Ceusters W, et al. (2015) *Basic formal*  
877 *ontology 2.0*. Available: <https://github.com/BFO-ontology/BFO2>.
- 878 Spear AD (2006) *Ontology for the Twenty First Century: An Introduction with*  
879 *Recommendations*. *Science*. pp 1–132.
- 880 Spear, A. D., Ceusters, W., & Smith, B. (2016). Functions in basic formal ontology.  
881 *Applied Ontology*, 11(2), 103-128.

- 882 Sumner, S., Bell, E., & Taylor, D. (2018). A molecular concept of caste in insect  
883 societies. *Current opinion in insect science*, 25, 42-50.
- 884 Strassmann, J. E. & Queller, D. C. (2007). Insect societies as divided organisms: the  
885 complexities of purpose and cross-purpose. *Proceedings of the national academy of*  
886 *sciences*, 104(suppl 1), 8619-8626.
- 887 Tanney, J. (2009) *Rethinking Ryle: A Critical Discussion of the Concept of Mind*. In:  
888 Ryle, G. *The Concept of Mind*. 60<sup>th</sup> Anniversary Edition. London: Routledge.
- 889 Tribble, W., Kronauer, D.J.C. (2017). Caste development and evolution in ants: it's all  
890 about size. *Journal of Experimental Biology* 220, 53-62
- 891 Tribble, W. & Kronauer, D. J. (2020). Hourglass Model for Developmental Evolution  
892 of Ant Castes. *Trends in ecology & evolution*, 36 (2): 100-103.
- 893 Valentine J.W. (2004) *On the origin of phyla*. Chicago: University of Chicago Press.  
894 pp 381–424.
- 895 Valentine, J. W., & May, C. L. (1996). Hierarchies in biology and paleontology.  
896 *Paleobiology*, 23-33.
- 897 Vogt, L. (2019). Levels and building blocks—toward a domain granularity framework  
898 for the life sciences. *Journal of Biomedical Semantics*, 10(1), 4.
- 899 Vogt, L. & Bartolomaeus, T. (2019). Adapting Ontologies to the Diagnostic Needs of  
900 Anatomy: Revisiting the Type Concept in Biology. Available at:  
901 <https://doi.org/10.13140/RG.2.2.14892.51844>
- 902 Vogt, L., Grobe, P., Quast, B., & Bartolomaeus, T. (2011). Top-level categories of  
903 constitutively organized material entities-suggestions for a formal top-level ontology.  
904 *PLoS One*, 6(4), e18794.
- 905 Vogt, L., Grobe, P., Quast, B., & Bartolomaeus, T. (2012a). Accommodating  
906 ontologies to biological reality—top-level categories of cumulative-constitutively  
907 organized material entities. *PLoS One*, 7(1), e30004.

- 908 Vogt, L., Grobe, P., Quast, B., & Bartolomaeus, T. (2012b). Fiat or bona fide  
909 boundary—a matter of granular perspective. *PLoS One*, 7(12), e48603.
- 910 Wilkinson, J. (1995) Aggregation in Natural Language Generation: Another Look.  
911 Technical report, Computer Science Department, University of Waterloo.
- 912 Wilson, E.O. (1975). *Sociobiology: The New Synthesis*. Harvard University Press.
- 913 Wilson, E. O. (1979). The evolution of caste systems in social insects. *Proceedings of*  
914 *the American Philosophical Society*, 123(4), 204-210.
- 915 Wimsatt, W. C. (1994). The ontology of complex systems: levels of organization,  
916 perspectives, and causal thickets. *Canadian Journal of Philosophy*, 24(sup1), 207-274.
- 917 Wu, T, Dhami, GK, Thompson, GJ. (2018) Soldier-biased gene expression in a  
918 subterranean termite implies functional specialization of the defensive caste.  
919 *Evolution & Development*. 20: 3-16.

## Tables

Table 1. Glossary of terms related to ontology development and computational reasoning.

| Name                      | Explanation                                                                                                                                                                                                                                                                                                                                                                                                                                                   |
|---------------------------|---------------------------------------------------------------------------------------------------------------------------------------------------------------------------------------------------------------------------------------------------------------------------------------------------------------------------------------------------------------------------------------------------------------------------------------------------------------|
| <i>Bona fide</i> boundary | Natural or mind-independent boundaries, which are physical boundaries in the things themselves that exist independently from human perception.                                                                                                                                                                                                                                                                                                                |
| Building block            | A ‘Lego-brick-like’ entity that evolves, diversifies, and provides reality’s inventories of basic categories of material entities. They are spatio-structurally, functionally, developmentally, and evolutionarily both integrated and stable, while increasing nature’s overall evolvability. They can interact with other building blocks to form aggregates and more complex building blocks, especially when analyzed in different granular perspectives. |
| Continuant entity         | An entity that persists, endures, or continues to exist through time while maintaining its identity. These entities incorporate both material and immaterial continuants extended and potentially moving in space, and the spatial regions at which they are located and through which they move, and their associated spatial boundaries.                                                                                                                    |
| Disjointness              | In an ontology, disjointness relates to two categories belonging at the same level of granularity that cannot share an instance.                                                                                                                                                                                                                                                                                                                              |
| Exhaustiveness            | Completeness of a given ontology in terms of types of entities and types of relations by which entities are tied together to form large wholes.                                                                                                                                                                                                                                                                                                               |
| <i>Fiat</i> boundary      | Artificial ( <i>i.e.</i> artifact of cognition) or mind-dependent boundaries, which are non-physical boundaries that depend on human decision and thus are the products of mental activities.                                                                                                                                                                                                                                                                 |
| Frame of reference        | General definition: a unit or organization of units that serve to identify a coordinate system with respect to which certain properties of objects, including the phenomenal self, they are gauged. This definition is modified depending on the domain of inquiry in which                                                                                                                                                                                   |

|                       |                                                                                                                                                                                                                                                                                                                             |
|-----------------------|-----------------------------------------------------------------------------------------------------------------------------------------------------------------------------------------------------------------------------------------------------------------------------------------------------------------------------|
|                       | <p>frames are used.</p> <p>Ontology development definition: a data structure that contains all the information in the ontology about a given domain of inquiry. It denotes a set of representative resources that provides a baseline value against which an ontology should be compared.</p>                               |
| Granularity framework | A static structure characterized by a set of granular levels and hierarchies ( <i>i.e.</i> granular perspectives) in a given subject domain.                                                                                                                                                                                |
| Granularity levels    | A set of several vertically stratified layers of entities and processes, accommodated within a given granular perspective.                                                                                                                                                                                                  |
| Granular perspective  | An hierarchy containing a set of vertically stratified layers of entities and processes.                                                                                                                                                                                                                                    |
| Material entity       | A continuant entity that is spatially extended and whose identity is independent of that of other entities and can be maintained through time.                                                                                                                                                                              |
| Occurrent entity      | An entity that unfolds itself in time, or it is the instantaneous boundary of such an entity ( <i>e.g.</i> a beginning or an ending), or it is a temporal or spatiotemporal region. Occurrent entities relate to processes, boundaries of processes, or spatial-temporal regions and can be arbitrarily summed and divided. |
| Realizable entity     | A specifically dependent continuant that inheres in other continuant entities and is not exhibited in full at every time.                                                                                                                                                                                                   |
| Reasoner              | A piece of software able to infer logical consequences from a set of asserted facts or axioms.                                                                                                                                                                                                                              |
| Single inheritance    | An ontological principle that establishes that every universal or class included in a given classification should stand in an inheritance relationship to exactly one universal or class at the next highest level.                                                                                                         |



## Figures

**Fig 1** Distinct top-level categories of entities and their respective relations following BFO's template and Vogt *et al.* (2012a) proposition. Top-level categories of entities: A. Top-level categories of entities, representing occurrent, continuant, independent, and specifically dependent entities and their respective relations. B. Top-level categories of material entities, showing the relations among BFO's and Vogt *et al.* (2012a) material entities. C. Top-level categories of realizable entities, showing the relations among BFO's realizable entities. Arrows indicate an *is\_a* relation property. Colors in the 'more-than less-than' boxes indicate the types of the top-level categories each entity is subsumed into: yellow are independent continuants, blue are specifically dependent continuants, and brown are occurrents.

**Fig 2.** Different frames of reference within material entities. Arrows indicate an *is\_a* relation property.

**Fig 3.** Distinct top-level categories of entities and their respective relations following BFO's template. **A.** Top-level categories of occurrents, with their respective relations. Arrows indicate an *is\_a* relation property. **B.** An exemplification of a relation between a given material entity, a given function, and a given process.

**Fig 4.** Simplified examples of entities and relations of 'caste' concepts modeled following distinct granular perspectives. **A.** An example of entities and relations of 'caste' concepts modeled following a CBB granular perspective. **B.** An example of entities and relations of 'caste' concepts modeled following a CFU granular perspective. **C.** An example of entities and relations of 'caste' concepts modeled following a CH/EU granular perspective. Entities marked with the "less-greater than" boxes of the same color belong to the same granular level.

**Fig 5.** A simplified model of Vogt's (2019) granularity framework, showing the integration among distinct granular perspectives through specific relations of granular representation. Some granular perspectives were omitted. CBB: Compositional Building Block; CBB-C: Compositional Building Block Cluster; F-BR: Function-based Representation; H/E-BR: Historical/Evolution-based Representation; FuncGranRep: has functional granular representation; Hist/EvGranRep: has historical/evolutionary granular representation. Adapted from Vogt (2019).

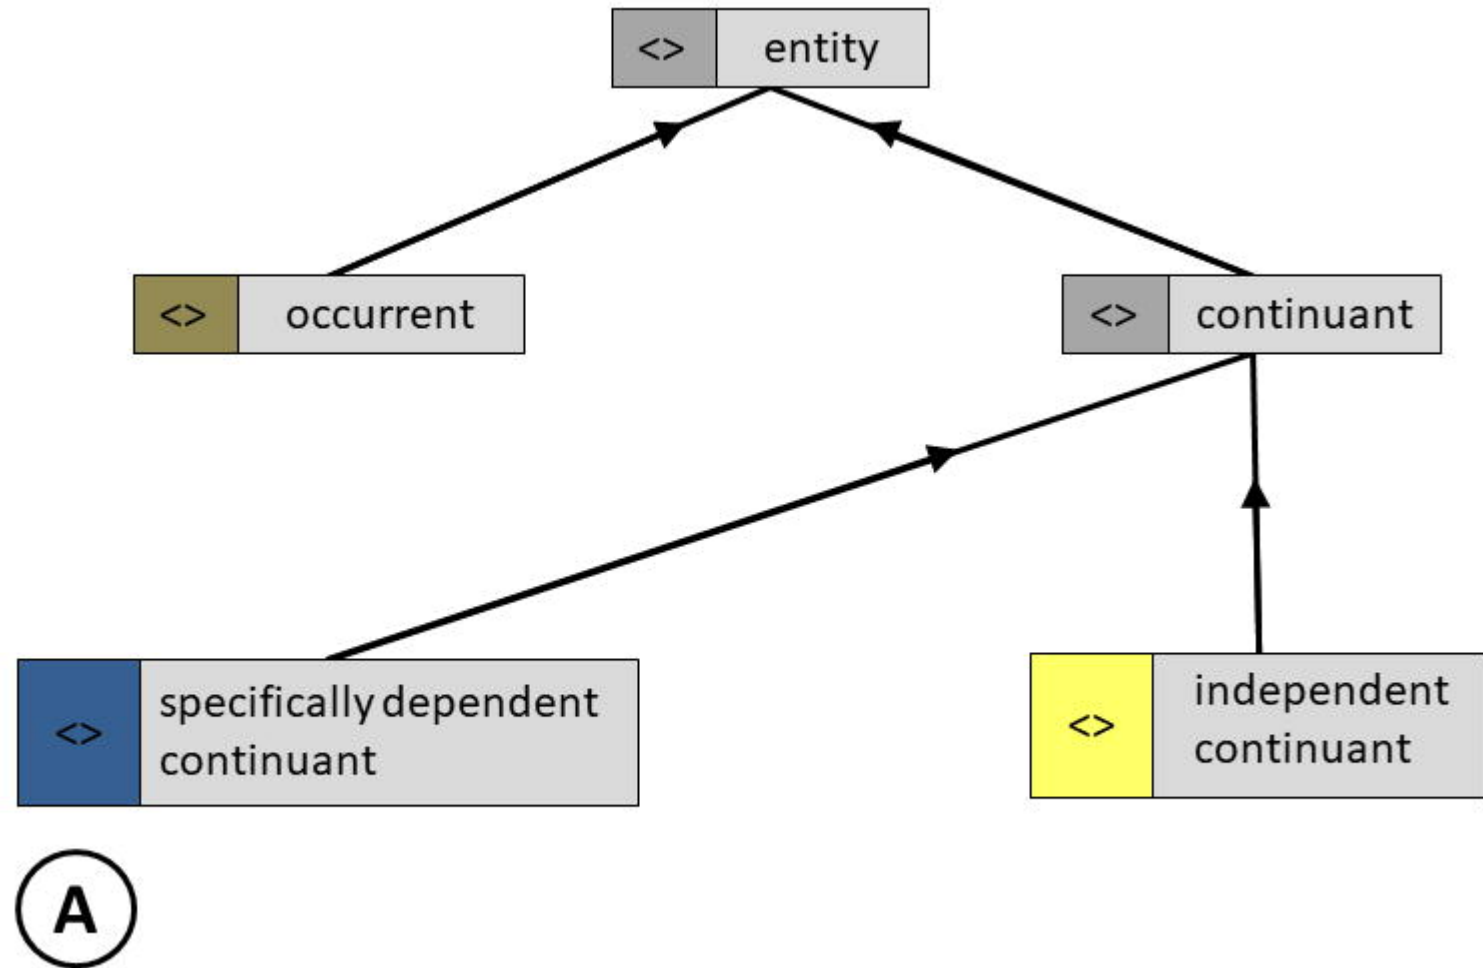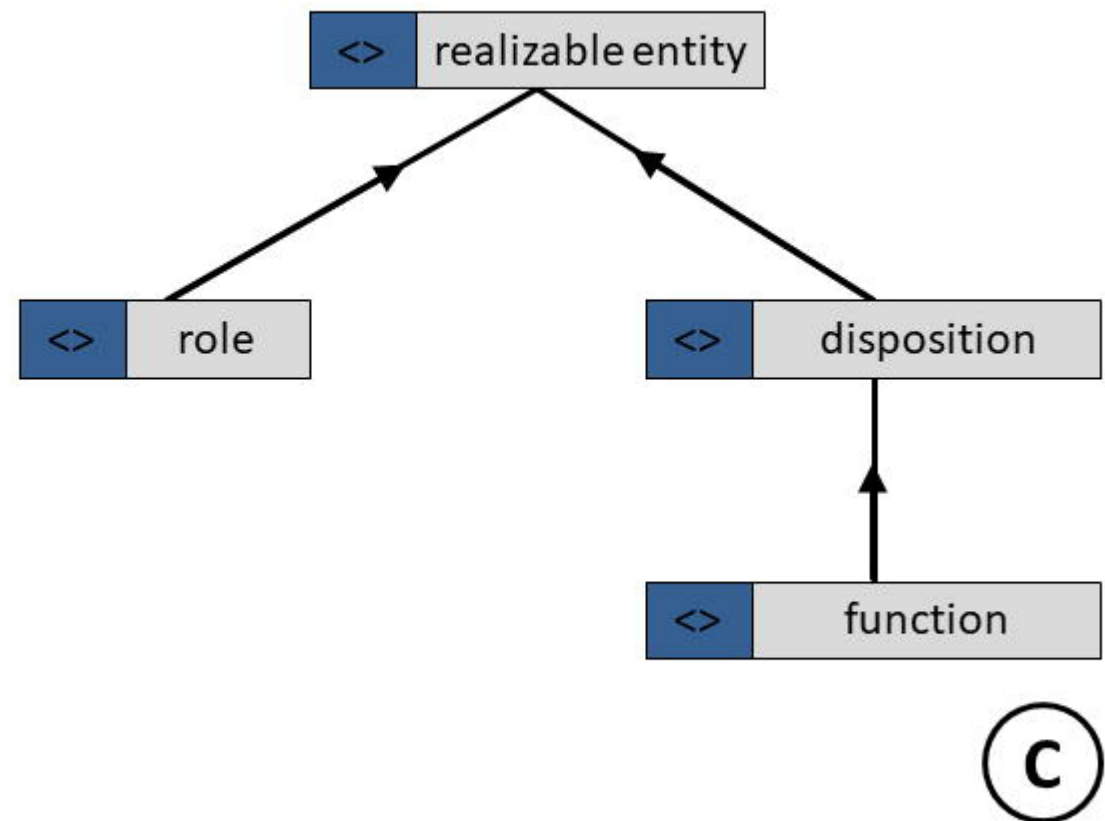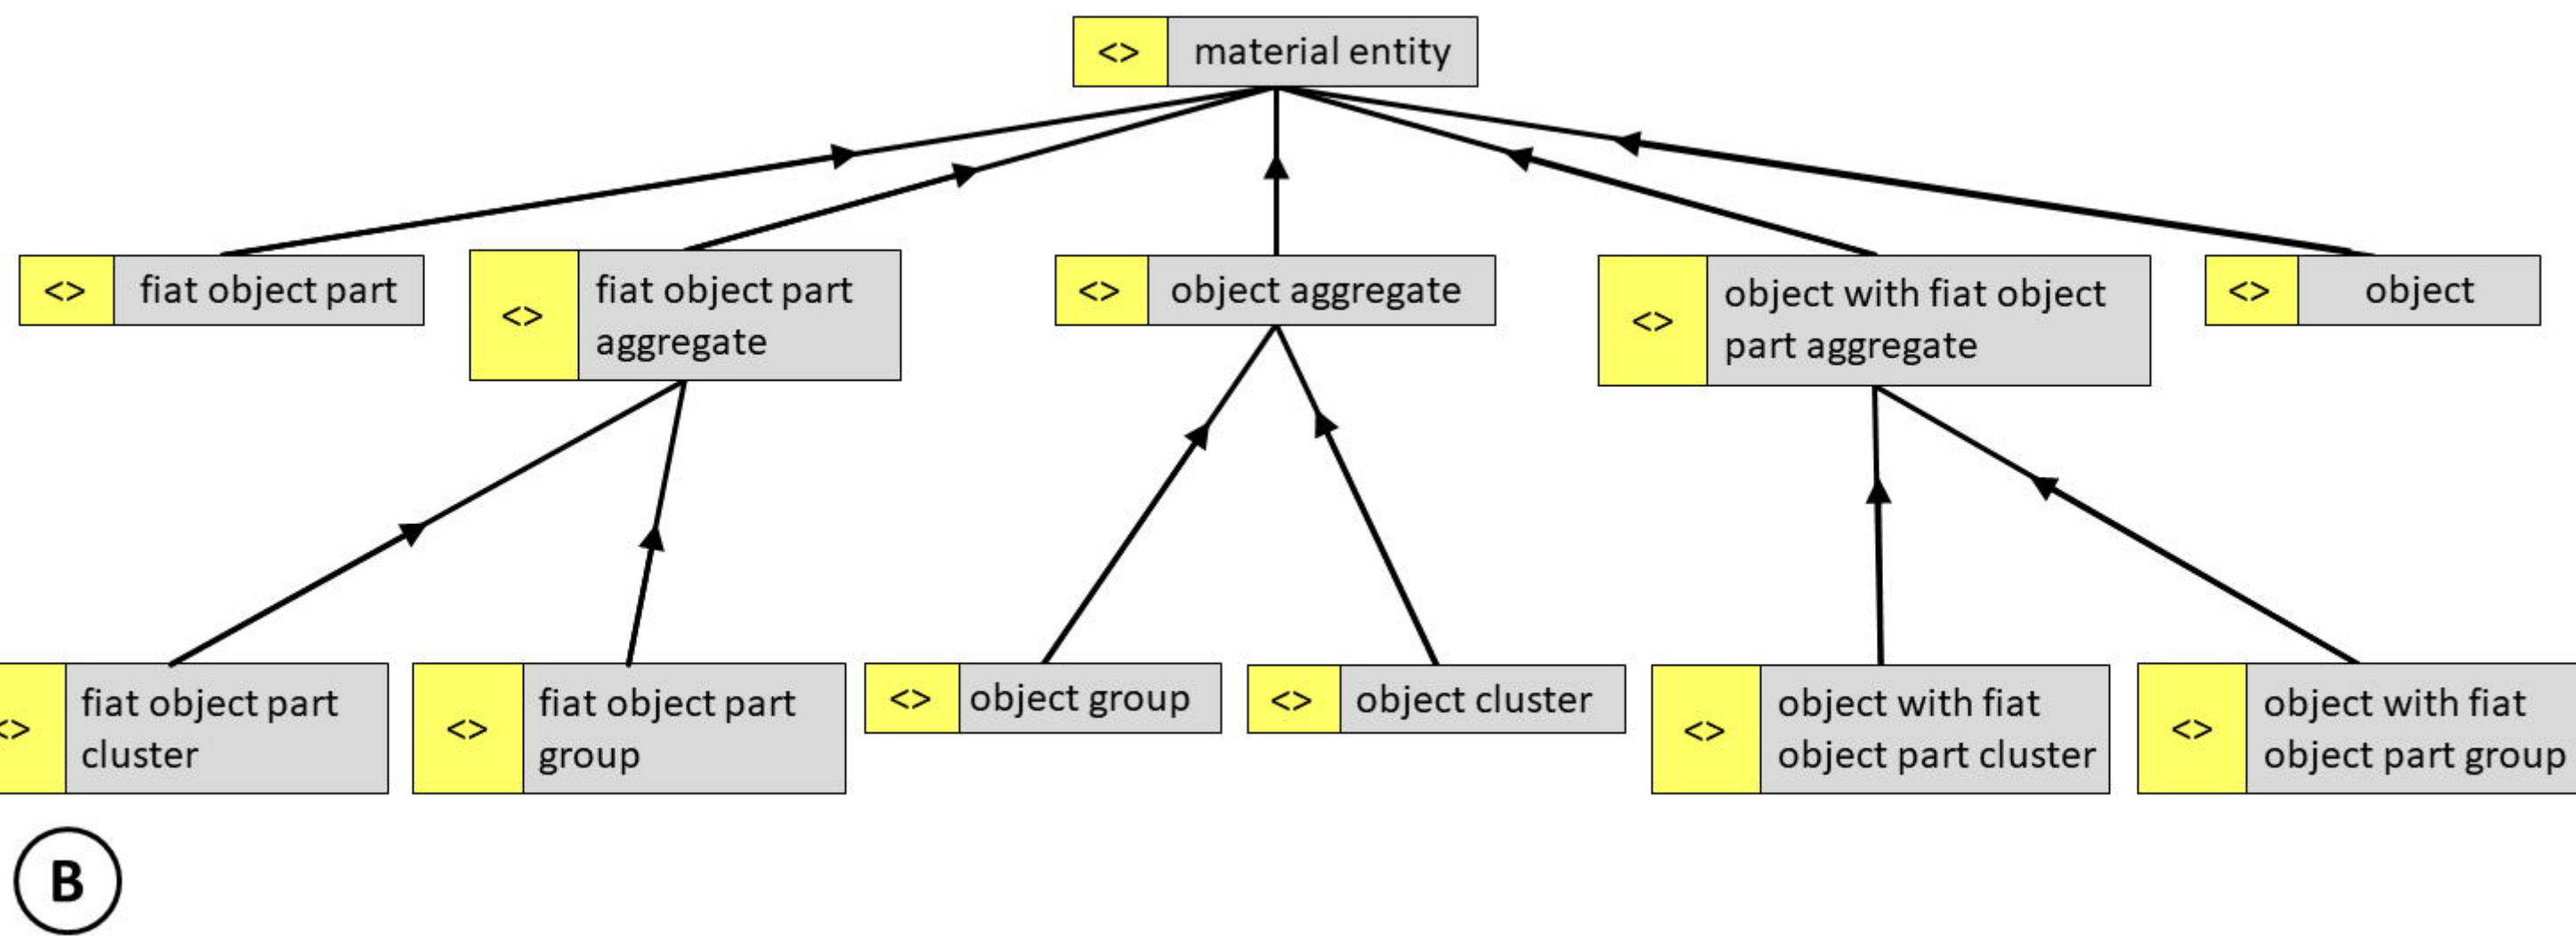

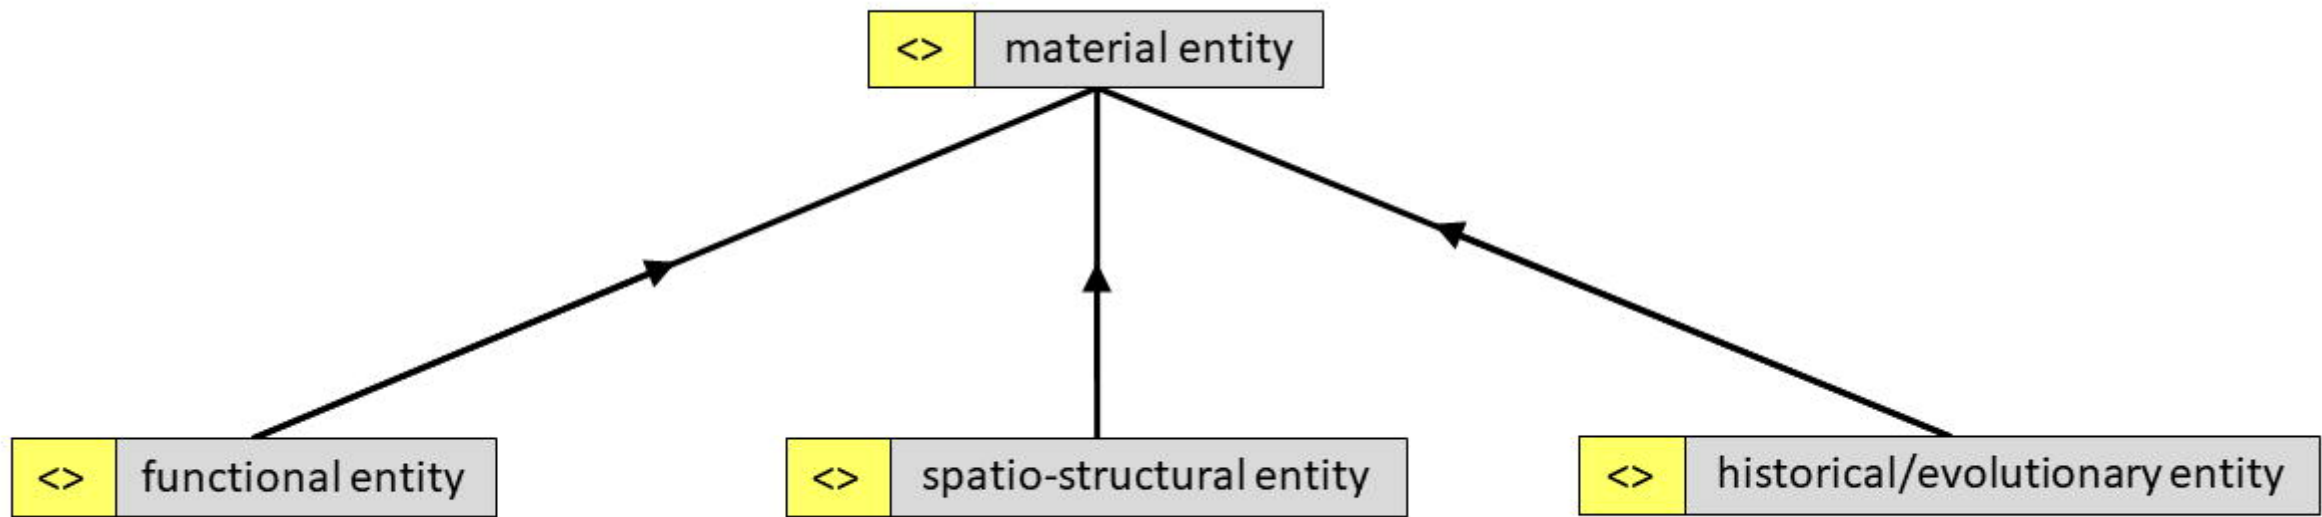

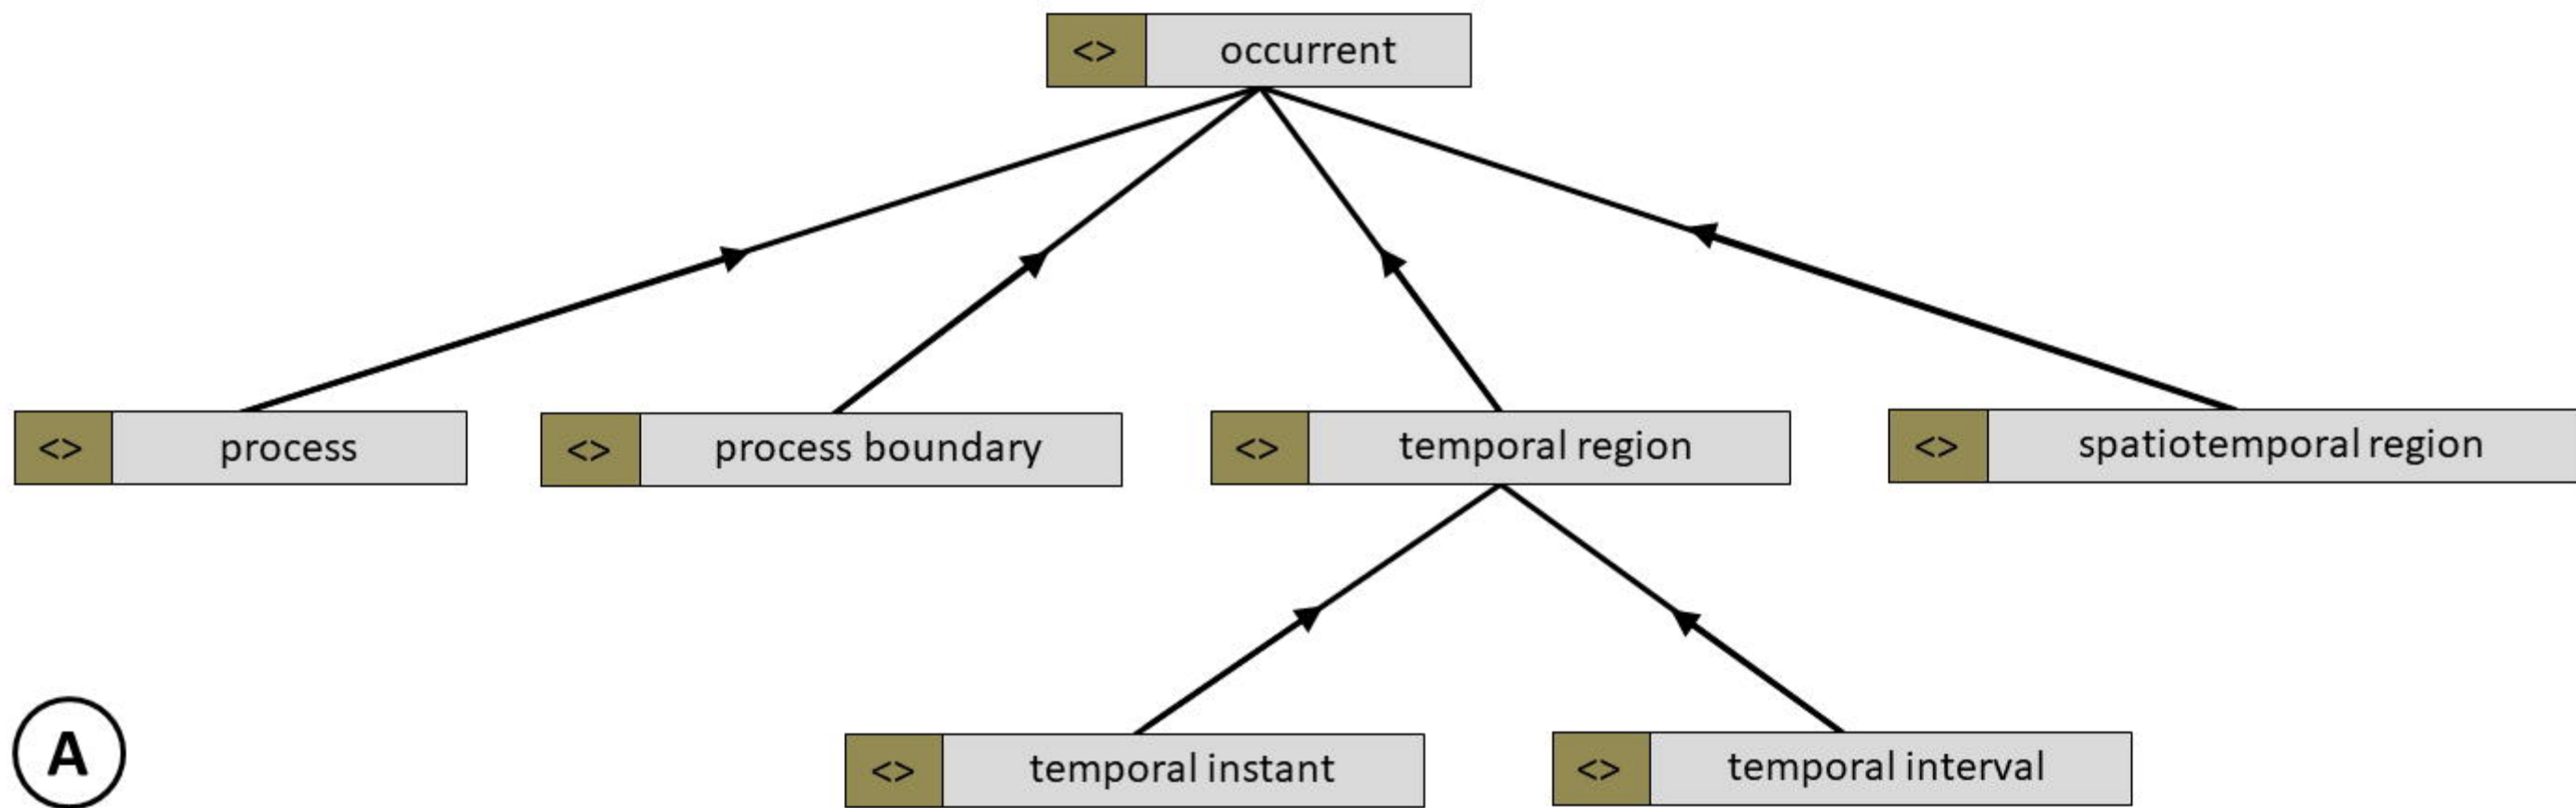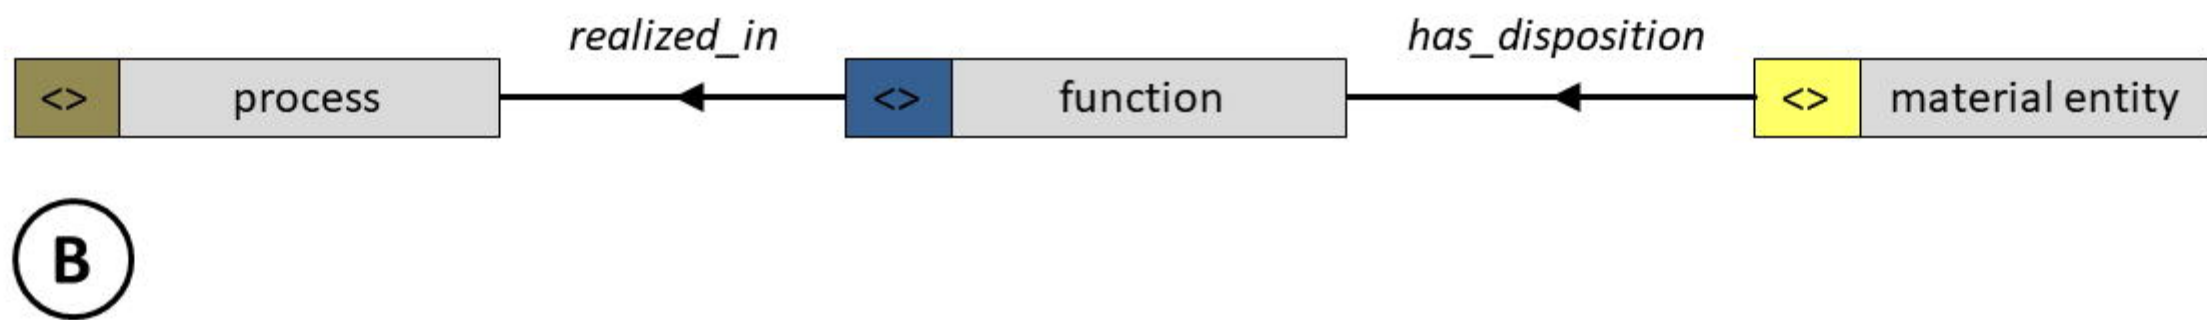

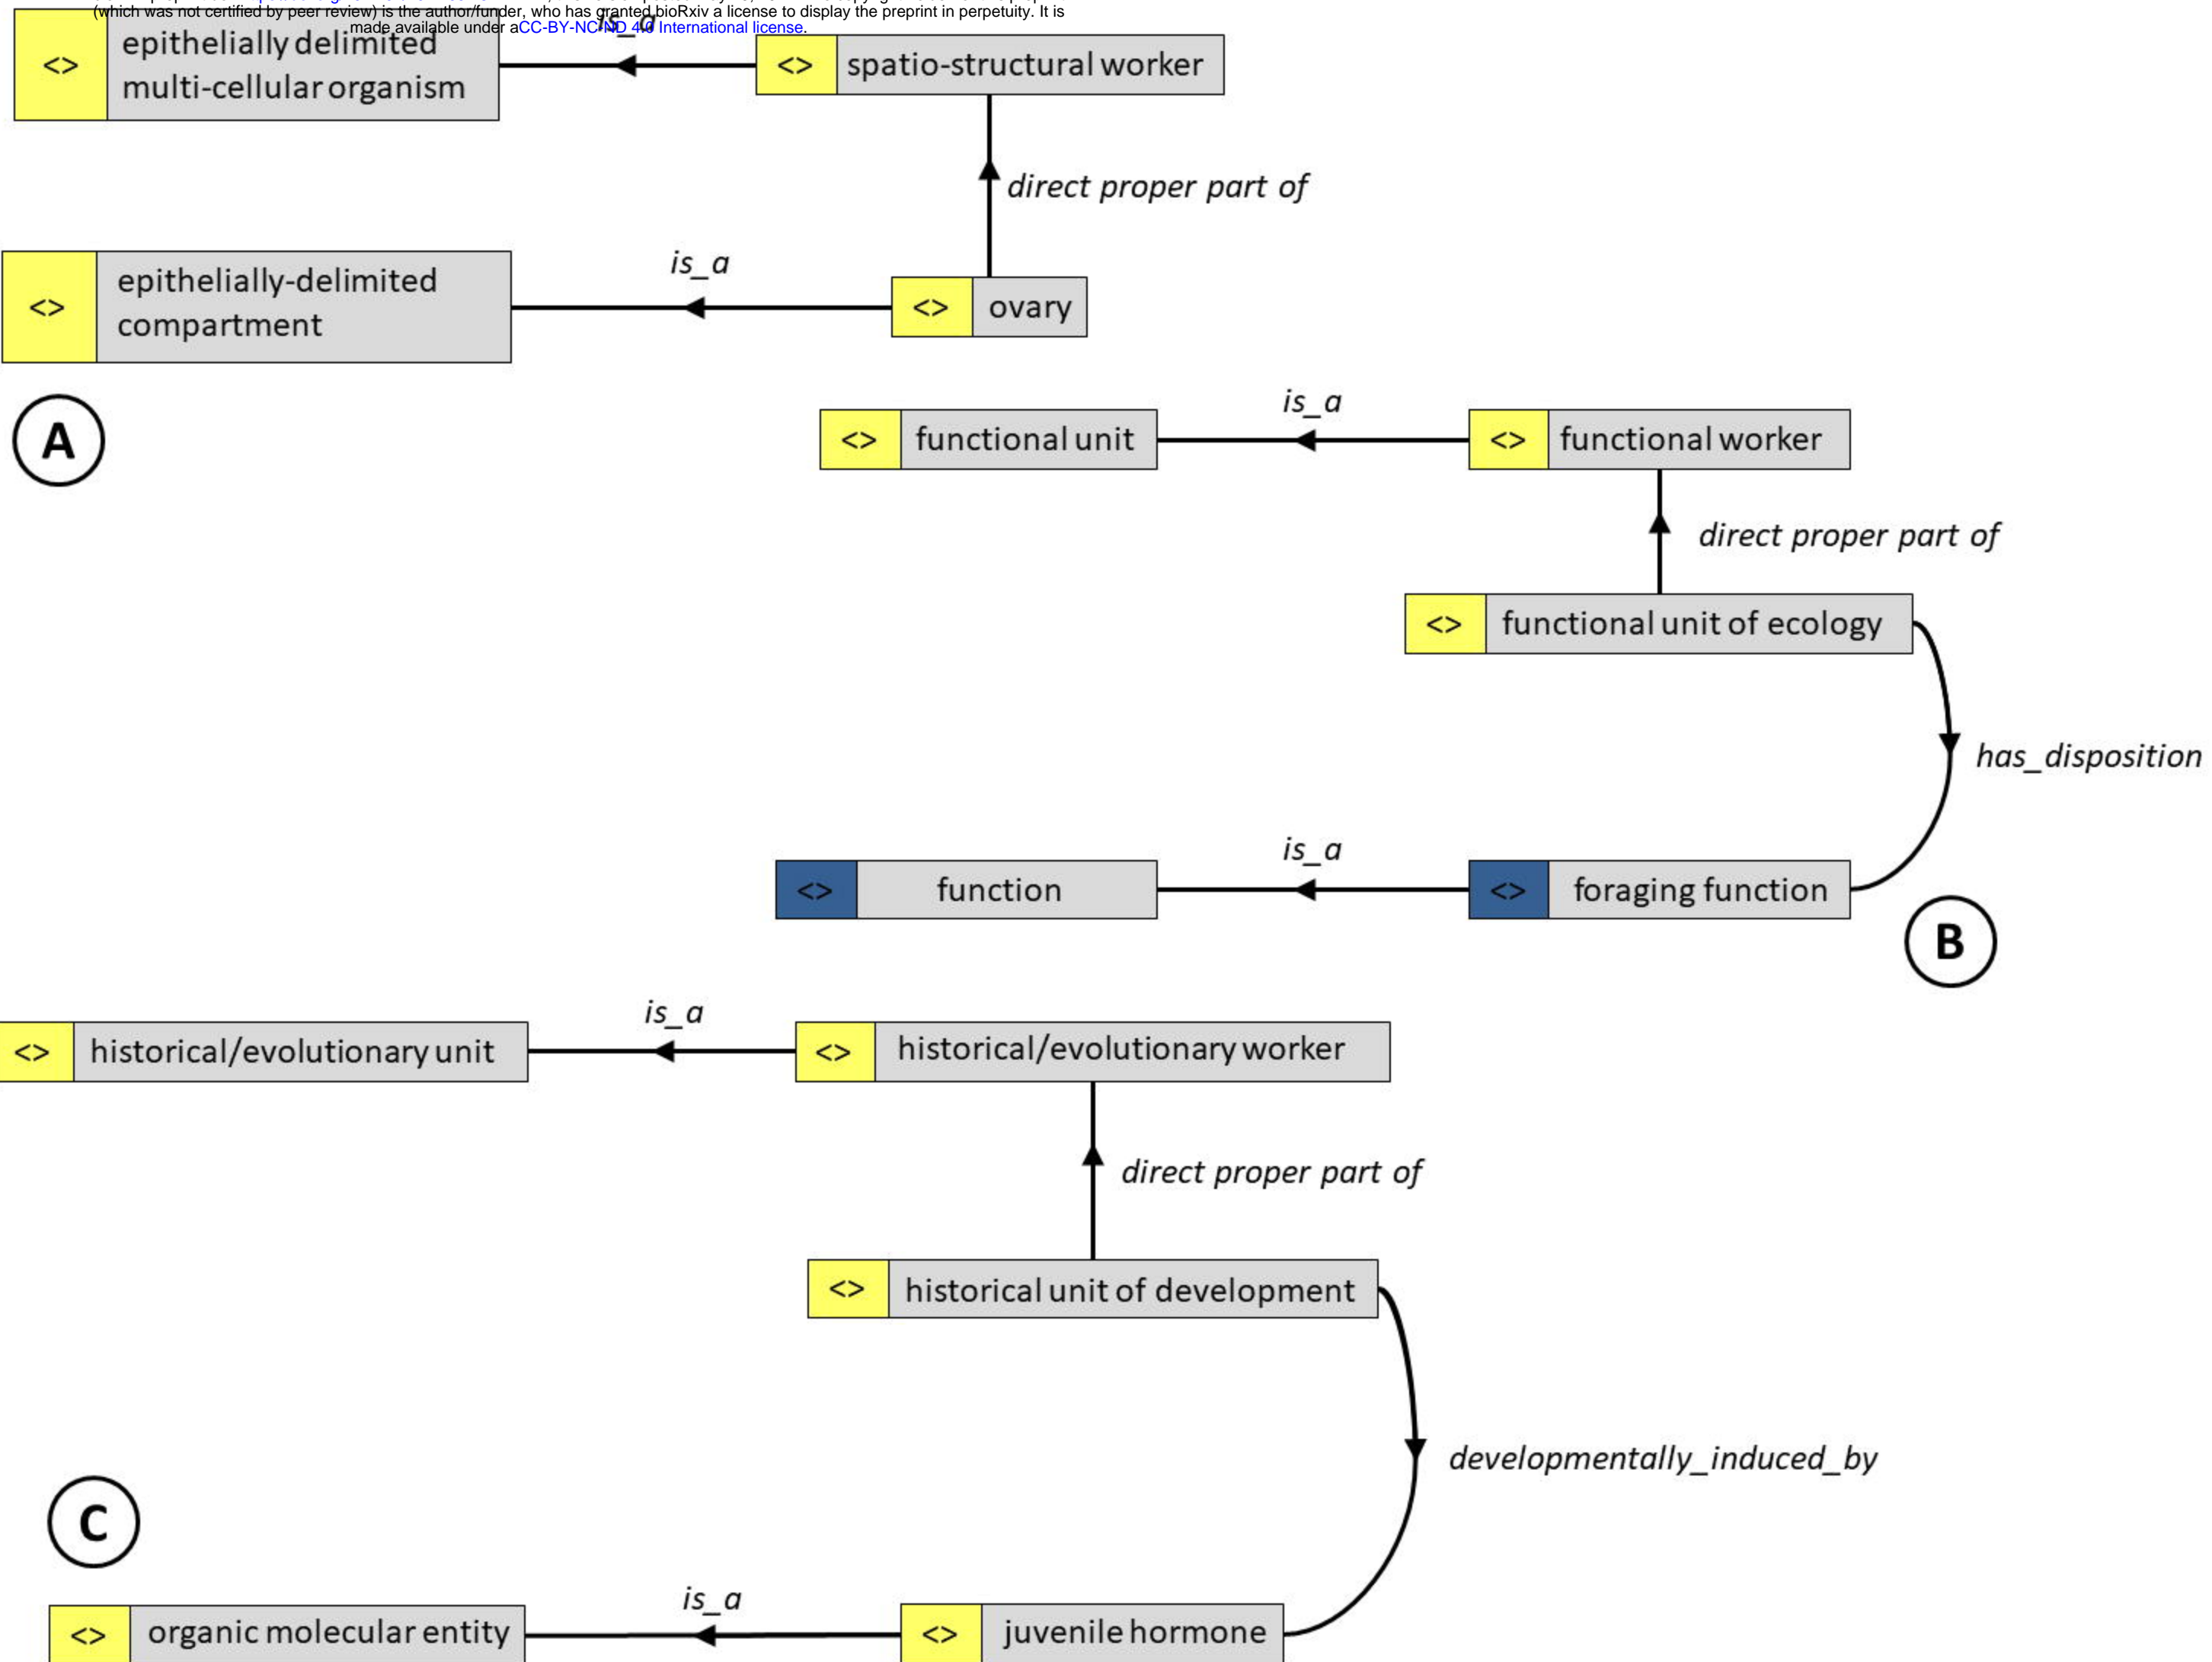

**F-BR granular perspective**

functional unit  
*e.g.* 'functional worker'

**CBB granular perspective**

epithelially-delimited multicellular organism  
*e.g.* 'spatio-structural worker'

**H/E-BR granular perspective**

historical/evolutionary unit  
*e.g.* 'historical/evolutionary worker'

A

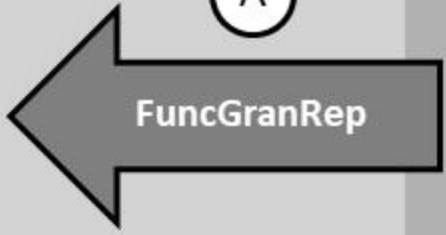

B

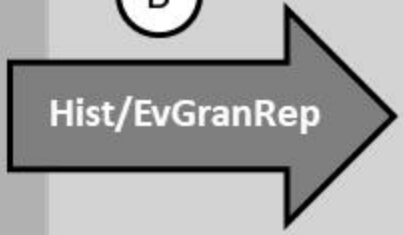

direct proper part of

epithelially-delimited compartment  
*e.g.* 'ovary'

**Region-based Fiat Building Block Aggregate granular perspective**

scattered fiat epithelially-delimited compartment entity      fiat epithelially-delimited compartment cluster  
*e.g.* 'female genitalia'

C

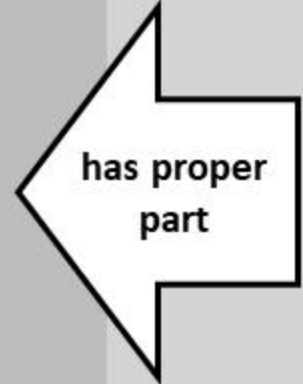

direct proper part of

eukaryotic cell  
*e.g.* 'oocyte'

**CBB-C granular perspective**

bona fide cluster of eukaryotic cells  
*e.g.* 'cluster of oocytes'

D

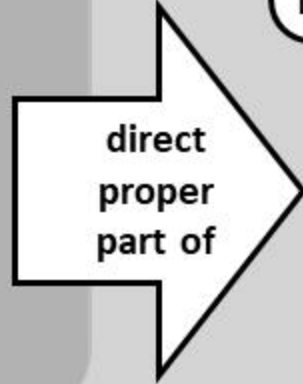

**Region-Based Building Block Cluster granular perspective**

group of fiat eukaryotic cell level entities      fiat eukaryotic cell cluster  
*e.g.* 'gonadal tube'

E

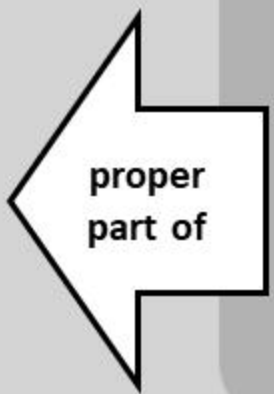

Source: https://www.biorxiv.org/content/10.1101/2021.05.18.444717v1.full.pdf
